# Supplementary material for: In‐Plate Chemical Synthesis of Isopeptide‐Linked SUMOylated Peptide Fluorescence Polarization Reagents for High‐Throughput Screening of SENP Preferences
Source: PubMed Central journal article supplement (PMC10107784; doi:10.1002/cbic.202200601), 2022-12-07
Supplement: CBIC-24-0-s001.pdf [file CBIC-24-0-s001.pdf]

# ChemBioChem

Supporting Information

## **In-Plate Chemical Synthesis of Isopeptide-Linked SUMOylated Peptide Fluorescence Polarization Reagents for High-Throughput Screening of SENP Preferences**

Yara Huppelschoten, Rishov Mukhopadhyay, Jens Buchardt, Thomas E. Nielsen, Alfred C. O. Vertegaal, Huib Ovaa<sup>#</sup>, and Gerbrand J. van der Heden van Noort<sup>\*</sup>

## General procedures

### Materials and solvents

Reagents were obtained from Sigma-Aldrich of the highest available grade and used without further purification. Standard Fmoc-protected amino acid derivatives were used and purchased from Gyros Protein Technologies unless mentioned otherwise. Fmoc-Cys(Acm)-OH and resins for SPPS were obtained from Novabiochem (Merck Millipore), Apigenex and PCAS Biomatrix. Pseudoproline dipeptides were obtained from Corden Pharma or Bachem. Iso-acyl dipeptides were obtained from AAPPTec. Solvents for SPPS were obtained from Biosolve. VA-044 was procured from Wako Pure Chemical Corporation. Oxyma Pure<sup>®</sup> was purchased from Gyros Protein Technologies. HPLC grade acetonitrile was obtained from Merck.

### Analytical methods

#### LC-MS conditions

LC-MS measurements were performed on a Waters Acquity UPLC H Class system, Waters Xevo G2-XS QToF with a Waters Acquity BEH 300 Å, C4, 1.7 µm, 2.1 mm x 50 mm (0.4 mL/min). Samples were run at 60 °C using 3 mobile phases: A = 0.1 % formic acid in MilliQ water, B = 0.1 % formic acid in acetonitrile and C = 0.01 % TFA in MilliQ water with a gradient of 5 to 25% B over 1 min, 25 to 65 % B over 6 min followed by 65 to 95 % B over 0.5 min maintaining a composition of 5% C throughout. Data processing was performed using Waters MassLynx Mass Spectrometry Software V4.2 (deconvolution with MaxEnt I function).

#### UPLC conditions

UPLC measurements were performed on a Waters Acquity UPLC H Class system with a Waters Acquity BEH column, C18, 1.7 µm, 2.1 mm x 50 mm (0.4 mL/min). Samples were run at 40 °C using 2 mobile phases: A = 0.05 % TFA in MilliQ water and B = 0.05 % TFA in acetonitrile with a gradient of 5 to 60 % B over 3.5 min followed 60 to 100% B over 0.5 min. Data processing was performed using Empower software.

#### Quantification

Charged Aerosol Detection (CAD)

Purified samples were quantified using a Thermo Scientific Vanquish, Corona Veo CAD. Samples were run Acquity BEH 300 Å, C4, 1.7 µm, 2.1 mm x 50 mm at 40 °C using 2 mobile phases: A = 0.1 % TFA in MilliQ water and B = 0.1 % TFA in acetonitrile with a gradient of 0 to 80 % B over 7 min.

#### Protein expression and purification

The human catalytic domains of SENP1 (amino acids 419-644), SENP2 (amino acids 364-589), SENP5 (amino acids 568-755), SENP6 (amino acids 628-1112) and SENP7 (amino acids 706-1050) were cloned into a pET28a vector (Addgene plasmid # 16357). All constructs encoded an N-terminal 6xHis-tag followed by a Thrombin cleavage site. Overexpression was performed in *Escherichia coli* BL21-CodonPlus (DE3)-RIL strain and grown in LB media using a LEX bioreactor or a shaker incubator. Cells were allowed to grow at 37 °C until an OD<sub>600</sub> of 1.2. Following this, protein expression was induced with 0.3 mM isopropyl-β-D thiogalactopyranoside (IPTG). Induction for SENP 1, 2 and 5 was performed at 30 °C for 3 hours and for SENP6 and 7 at 25 °C for 5 hours. Cells were harvested and resuspended in lysis buffer (50 mM HEPES, 200 mM NaCl and 5% glycerol). Buffer was supplemented with phenylmethylsulfonylfluoride (PMSF) (1 mM) and benzamidine (1 mM). Lysis was performed using a sonicator 3000; misonix for 3 minutes with 15-/45-s on/off cycles followed by centrifugation at 24,000 x g for 45 minutes at 4°C. The proteins were purified by his-tag purification using Qiagen Ni-NTA resin. The beads were washed with washing buffer (50 mM HEPES, 200 mM NaCl, 20 mM

Imidazole) and eluted with elution buffer (50 mM HEPES, 200 mM NaCl, 200 mM Imidazole and 2 mM TCEP). Thereafter, proteins were dialyzed overnight in buffer containing 20 mM HEPES, 100 mM NaCl, 2 mM TCEP. After dialysis the proteins were further purified using size exclusion in 20 mM HEPES, 100 mM NaCl and 2 mM TCEP using a superdex 75 10/300 GL column (GE Healthcare). Fractions were pooled and concentrated using amicon spin filters with a MW cut off of 30 kDa. The concentrated fractions were flash frozen and stored at -80 °C until further use. All SENPs expressed with an average yield between 1-5 mg/L.

## Solid Phase Peptide Synthesis (SPPS)

### Automated Fmoc SPPS

#### Method 1

SPPS was performed on a Symphony X (Gyros Protein Technologies) automated peptide synthesizer using standard 9-fluorenylmethoxycarbonyl (Fmoc) based SPPS. Fmoc deprotection was achieved with 2 x 10 min. treatment of 20 vol. % piperidine, 0.1 % Oxyma Pure® in DMF. Peptide couplings were performed using DIC/Oxyma. Amino acid/Oxyma solutions (0.3 M/0.3 M in DMF) were added to the resin at 4-6-fold excess together with equal equivalents of DIC (1.5 M in DMF). The coupling time was 2 hours unless specified otherwise. All dipeptide building blocks were coupled for 4 hours. The residual free amino groups after the coupling reaction were capped by the addition of collidine (3.3 equiv., 1.5 M in DMF) and acetic anhydride (11 equiv., 1.0 M in DMF) and were reacted for 20 minutes. After the final Fmoc deprotection the resin was washed with DMF and DCM.

#### Method 2

SPPS was performed on a SYRO II (Multisyntech, SYRO Robot) automated peptide synthesizer using standard 9-fluorenylmethoxycarbonyl (Fmoc) based SPPS. Fmoc deprotection was achieved with 2 x 2 min. and 1x 5 min treatment of 20 vol. % piperidine in NMP. Peptide couplings were performed using PyBOP/DIPEA. Amino acid solutions (0.34 M in NMP) were added to the resin at 4-fold excess together with an 8-fold excess of DIPEA (1.36 M in NMP) and 8-fold excess of PyBOP (0.34 M in NMP). The coupling time was 2x 25 minutes unless specified otherwise. After the final Fmoc deprotection the resin was washed with NMP and DCM.

### Synthesis in 96-well plate format

The synthesis was performed using an automated peptide synthesizer (Intavis, Multi pep CF) using standard 9-fluorenylmethoxycarbonyl (Fmoc) based SPPS. Fmoc deprotection was achieved with 2 x 10 min. treatment of 20 vol. % piperidine, 0.1 % Oxyma Pure® in DMF. Peptide couplings were performed using DIC/Oxyma Pure®. Amino acid/Oxyma Pure® solutions (0.3 M/0.3 M in DMF) were added to the resin at 4-fold excess together with equal equivalents of DIC (1.5 M in DMF). Triple couplings were performed with a coupling time of 1 hour. After the final Fmoc deprotection the resin was washed with DMF and DCM.

### Global deprotection from the resin and side chain deprotection

Polypeptide sequences containing a cysteine residue were detached from the resin and deprotected by treatment with Reagent K (TFA/phenol/H<sub>2</sub>O/thioanisole/EDT, 82.5:5:5:5:2.5 v/v/v/v/v) for 2-3 hours followed by precipitation in ice cold diethylether and collection by centrifugation. The pellet was resuspended in diethylether before being collected by centrifugation again. The pellet was dissolved in H<sub>2</sub>O/CH<sub>3</sub>CN/AcOH, 65:25:10, v/v/v and lyophilized before purification.

### Purification of peptides

Preparative purification was performed on a Gilson HPLC system using a Phenomenex, Luna 100 Å, C8(2), 10 µm, 30 mm x 250 mm column. Elution was performed using 2 mobile phases: A = 0.1 % TFA in MilliQ water and B = 0.1% TFA in acetonitrile using a linear gradient. Fractions were collected using

a Gilson fraction collector and relevant fractions were assessed by analytical LC-MS. Fractions containing the pure peptide were pooled and lyophilized.

Semi-preparative purification was performed on an Agilent 1260 Infinity II using fluorescence detection. Elution was performed using 2 mobile phases: A = 0.1 % TFA in MilliQ water and B = 0.1% TFA in acetonitrile using a linear gradient. Fractions were assessed by analytical LC-MS. Fractions containing the pure peptide were pooled and lyophilized.

**Table S1.** Amino acids sequences of all peptides and their corresponding position in the 96-well plate derived protein and position in the protein.

| #  | Well | Protein | Lysine | Sequance     | #  | Well | Protein | Lysine | Sequance      |
|----|------|---------|--------|--------------|----|------|---------|--------|---------------|
| 1  | A 1  | TRIM28  | 779    | KLTEDEKADVQS | 49 | E 1  | ZNF106  | 911    | ATMHLKQEVTP   |
| 2  | A 2  | SUMO2   | 11     | PKEGVKTENND  | 50 | E 2  | TOP1    | 117    | SPPQIKDEPED   |
| 3  | A 3  | PML     | 490    | PRKVIKMESEE  | 51 | E 3  | XRCC6   | 556    | GSKRPKVEYSE   |
| 4  | A 4  | RANGAP1 | 524    | HMGLLKSEDKV  | 52 | E 4  | SPRTN   | 423    | DNFFIKKEQIK   |
| 5  | A 5  | RSF1    | 277    | EETTVKKEKED  | 53 | E 5  | SART1   | 709    | YKPDVKIEYVD   |
| 6  | A 6  | TRIM28  | 750    | ARLQEKLSPPY  | 54 | E 6  | MKI67   | 2734   | QKVQVKEEPSA   |
| 7  | A 7  | HNRNPM  | 698    | GCGVVKFESPE  | 55 | E 7  | IFI16   | 561    | LKPRLKTEPEE   |
| 8  | A 8  | SAFB2   | 293    | LLAVVKREPAAE | 56 | E 8  | TDG     | 330    | KKMAVKEEKYD   |
| 9  | A 9  | SUMO3   | 11     | PKEGVKTENDH  | 57 | E 9  | PIAS1   | 238    | YLPPTKNGVEP   |
| 10 | A10  | SNIP1   | 30     | AGVVVKQERLS  | 58 | E10  | UBC     | 48     | LIFAGKQLEDG   |
| 11 | A11  | TOP2A   | 1240   | NKKKIKNENTE  | 59 | E11  | MKI67   | 1035   | GKVGVKEELLA   |
| 12 | A12  | SART1   | 141    | EVNAIKKEAGT  | 60 | E12  | PIAS1   | 315    | ALIKEKLTADP   |
| 13 | B 1  | TRIM33  | 776    | DQVKVKQEPGT  | 61 | F 1  | SUMO2   | 7      | ADEKPKKEGVKT  |
| 14 | B 2  | NOP58   | 467    | AKIKVKVEEEE  | 62 | F 2  | KIF23   | 662    | IVTEPKTEKPE   |
| 15 | B 3  | GTF2I   | 221    | GPIKVKTEPTE  | 63 | F 3  | SP100   | 297    | RLVDIKKEKPF   |
| 16 | B 4  | GTF2I   | 488    | GSTEAKAVPYQ  | 64 | F 4  | BAZ1B   | 826    | KKEIVKFEPQV   |
| 17 | B 5  | NPM1    | 32     | KDYHFKVDNDE  | 65 | F 5  | PBRM1   | 1293   | IYYFRKPIVPQ   |
| 18 | B 6  | UBC     | 11     | KTLTGKTITLE  | 66 | F 6  | ZNF106  | 1737   | LVRIYKGNHHA   |
| 19 | B 7  | PARP1   | 486    | WGAEVKAEPVE  | 67 | F 7  | CBX3    | 103    | ESDDSKSKKKR   |
| 20 | B 8  | PML     | 160    | HQWFLKHEARP  | 68 | F 8  | CBX4    | 280    | QAVKIKSGEVA   |
| 21 | B 9  | HSF2    | 82     | DSGIVKQERDG  | 69 | F 9  | MKI67   | 2009   | GKVGVKEEVLP   |
| 22 | B10  | BCLAF1  | 831    | FQKRPKEEWD   | 70 | F10  | PARP1   | 467    | VSASTKSLQEL   |
| 23 | B11  | BRD4    | 1111   | PLVVVKEEKIH  | 71 | F11  | PIAS2   | 443    | SQPCTKIESSS   |
| 24 | B12  | SAFB2   | 225    | LGETCKSEPVK  | 72 | F12  | TOP2B   | 1227   | KPKVKKLQLEE   |
| 25 | C 1  | TRIM24  | 723    | EPIRIKQENSG  | 73 | G 1  | UIMC1   | 20     | RNLEKKDVETT   |
| 26 | C 2  | ZMYM4   | 250    | SNIRIKKEPLD  | 74 | G 2  | XPC     | 81     | AKVTVKSENLK   |
| 27 | C 3  | ZMYM4   | 273    | LLDKIKDEPDN  | 75 | G 3  | ZNF451  | 832    | KSNLYKFTASA   |
| 28 | C 4  | ZBTB2   | 505    | VLASIKKEQET  | 76 | G 4  | PARP1   | 203    | QLPGVKSEGKR   |
| 29 | C 5  | HNRNPM  | 17     | AATEIKMEEES  | 77 | G 5  | SUMO2   | 5      | _MADEKPKKEGV  |
| 30 | C 6  | SUMO1   | 7      | SDQEAKPSTED  | 78 | G 6  | ZMYM2   | 98     | QGNSKITPSS    |
| 31 | C 7  | UBE2I   | 49     | AIPGKKGTPWE  | 79 | G 7  | SUMO1   | 37     | SEIHFKVKMTT   |
| 32 | C 8  | GTF2I   | 456    | PASGVKEEWYA  | 80 | G 8  | UBC     | 63     | DYNIQKESTLH   |
| 33 | C 9  | SUMO3   | 41     | HTPLSKLMKAY  | 81 | G 9  | PCNA    | 164    | VISCAKDGVKF   |
| 34 | C10  | RSF1    | 456    | VAPNFKTEPIE  | 82 | G10  | PML     | 380    | GFDEFKVRQLD   |
| 35 | C11  | SAFB2   | 517    | HSVEIKIEKTV  | 83 | G11  | NOP56   | 540    | KKSTPKREETVN  |
| 36 | C12  | GTF2I   | 991    | GSSQIKQEPDP  | 84 | G12  | PIAS2   | 249    | YAPPPKNGIEQ   |
| 37 | D 1  | ZBTB21  | 879    | LKIQVKEEPVE  | 85 | H 1  | SP100   | 306    | PFSNSKVECQA   |
| 38 | D 2  | ZNF451  | 706    | TETSIKTEDDF  | 86 | H 2  | PIAS1   | 46     | ALHLLKAGCSP   |
| 39 | D 3  | NUMA1   | 1766   | QRLPPKVESLE  | 87 | H 3  | PIAS1   | 137    | VHPDIKLQKLP   |
| 40 | D 4  | BCLAF1  | 676    | EERVFKEENQK  | 88 | H 4  | ETV6    | 11     | AQCSIKQERIS   |
| 41 | D 5  | PARP1   | 512    | SKGQVKEEGIN  | 89 | H 5  | HNRNPM  | 388    | GEIIAQGGGG    |
| 42 | D 6  | ZNF451  | 130    | NNSDTKISETE  | 90 | H 6  | SUMO1   | 17     | DLGDKKEGEYI   |
| 43 | D 7  | SUMO3   | 32     | SVVQFKIKRHT  | 91 | H 7  | TP53BP1 | 217    | ANTAIAKHHEEQS |
| 44 | D 8  | TOP1    | 153    | KPKKIKTEDTK  | 92 | H 8  | TP53BP1 | 1434   | LSPDDKSFSRV   |
| 45 | D 9  | CCAR1   | 1012   | PTPTVKQESKD  | 93 | H 9  | TP53BP1 | 1563   | VKGRKESGEL    |
| 46 | D10  | TOP2A   | 1228   | ITIEMKAEAEK  | 94 | H10  | RANBP2  | 2571   | SGSESKVEPKK   |
| 47 | D11  | ADAR    | 418    | QEPVIKLENRQ  | 95 | H11  | CDK11B  | 243    | GRKPVKEEKME   |
| 48 | D12  | TRIM33  | 793    | FSGGVKQEKTE  | 96 | H12  | MCM3    | 732    | DSQETKESQKV   |

## Synthesis of SUMO3 thioester (1)

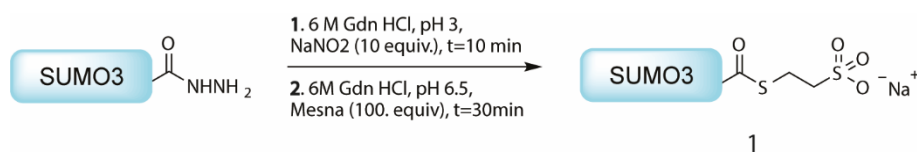

The synthesis was performed following general procedures (method 1) using 2-chlorotriethyl hydrazine resin (0.32 mmol/gram). The peptide was cleaved from the resin according to the general procedures and the crude peptide was directly used for thioesterification. Crude peptide **1** (215 mg, 0.02 mmol) was dissolved in 12 mL of 6 M Gdn.HCl pH 3.0 and 1 M NaNO<sub>2</sub> in MilliQ (0.2 mL, 0.2 mmol, 10 equiv.) was added and stirred for 15 min at 0 °C. The reaction was warmed to room temperature and MESNa (259 mg, 1.5 mmol, 75 equiv.) in 2 mL of 6 M Gdn.HCl, 0.2 M phosphate pH 7.0 was added. The pH was adjusted to pH 7.0 and the solution was stirred for 30 min. before purification by preparative RP-HPLC using Phenomenex, Luna 100 Å, C8(2), 10 μm, 30 mm x 250 mm (25 to 35 % B over 30 min, 30mL/min) followed by lyophilization afforded peptide **1** as a white solid (21 mg, 0.002 mmol 10 % yield).

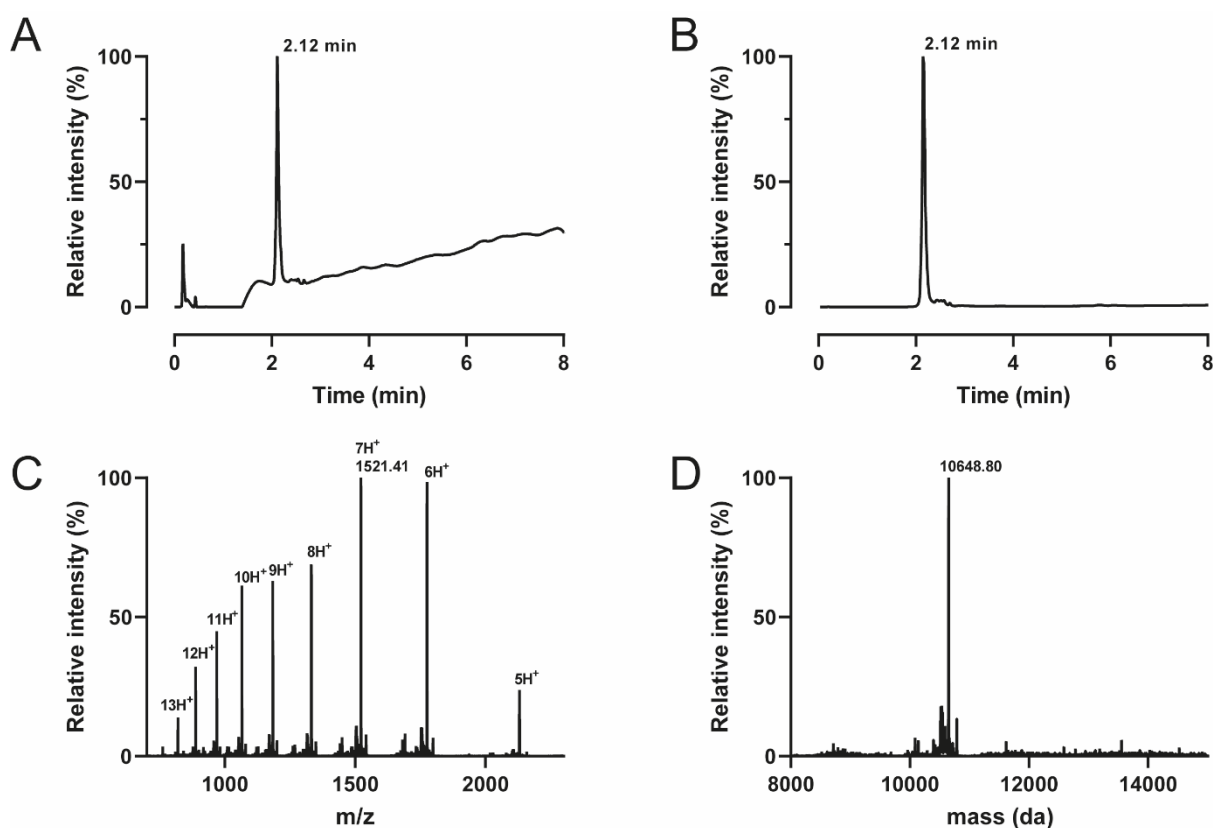

**Figure S1.** **A.** UV chromatogram of purified **1**, Rt 2.12 min. **B.** Total ion spectrum of purified **1**, Rt 2.12 min. **C.** Observed ESI spectrum of purified **1**. Calculated Mass (average isotope composition): 10642.16; [M + 5H]<sup>5+</sup>: 2129.43, [M + 6H]<sup>6+</sup>: 1774.69, [M + 7H]<sup>7+</sup>: 1521.31, [M + 8H]<sup>8+</sup>: 1331.27, [M + 9H]<sup>9+</sup>: 1183.46, [M + 10H]<sup>10+</sup>: 1065.22, [M + 11H]<sup>11+</sup>: 968.47, [M + 12H]<sup>12+</sup>: 887.85, [M + 13H]<sup>13+</sup>: 819.63. Observed; [M + 5H]<sup>5+</sup>: 2129.56, [M + 6H]<sup>6+</sup>: 1774.81, [M + 7H]<sup>7+</sup>: 1521.41, [M + 8H]<sup>8+</sup>: 1331.36, [M + 9H]<sup>9+</sup>: 1183.55, [M + 10H]<sup>10+</sup>: 1065.31, [M + 11H]<sup>11+</sup>: 968.55, [M + 12H]<sup>12+</sup>: 887.93, [M + 13H]<sup>13+</sup>: 819.70. **D.** Deconvoluted mass of purified **1**, mass calculated: 10648.9, observed: 10648.80.

### **Synthesis of RANGAP1 (A4)**

The synthesis was performed following general procedures (method 1) using Rink Amide resin (446 mg, 0.59 mmol/gram). The peptide was cleaved from the resin using TFA/H<sub>2</sub>O/TIPS 95:2.5:2.5, v/v/v followed by evaporation of the TFA using nitrogen flow. Next, the peptide was dissolved in a mixture of H<sub>2</sub>O/ACN 90:10, v/v, followed by purification by preparative RP-HPLC using a Phenomenex, Gemini® 110 Å, C18, 5 µm, 30 mm x 250 mm column (10 to 30 % B over 25 min, 30mL/min). The fractions were analyzed and pooled according to purity followed by lyophilization afforded RANGAP1 as a pink solid (71 mg, 0.037 mmol 14 % yield).

### **Synthesis of 96-well plate containing peptides**

The synthesis was performed following general procedures using 8 µM of Rink Amide resin (100-200 mesh, Novabiochem, HL, 057 mmol/gram) per well. As final coupling Fmoc-PEG<sub>2</sub>-OH and TAMRA were coupled following general procedures method to all peptides. Next, the peptides were cleaved from the resin using TFA/H<sub>2</sub>O/TIPS 95:2.5:2.5, v/v/v followed by evaporation of the TFA. Peptides were dissolved in a mixture of H<sub>2</sub>O/ACN 90:10, v/v, and purified using a Waters Arc HPLC system containing a Waters ACQUITY QDa Detector, fraction collector and a Phenomenex, Gemini® 110 Å, C18, 5 µm, 10 mm x 150 mm column. Fractions were collected based on molecular weight, analyzed using UPLC and pooled based on purity before lyophilization. Next, the peptides were dissolved in 500 µL of a H<sub>2</sub>O/ACN 90:10 mixture and the concentration was determined using CAD as described in general procedures to determine the amount of peptide (table S2). 95 peptides were obtained with an average yield of 3.4 % ranging from 0.5 % to 8.5 %.

**Table S2.** Calculated yields per peptide. Peptide in red failed during synthesis or purification.

| Well | MW      | Mg obtained | Yield (%) | Well | MW      | Mg obtained | Yield (%) |
|------|---------|-------------|-----------|------|---------|-------------|-----------|
| A 1  | 1909.53 | 0.13        | 0.82      | E 1  | 1930.53 | 0.63        | 4.09      |
| A 2  | 1906.43 | 0.53        | 3.46      | E 2  | 1930.43 | 0.38        | 2.46      |
| A 3  | 2021.73 | 1.38        | 8.52      | E 3  | 1955.63 | 0.53        | 3.39      |
| A 4  | 1932.73 | N.D.        | N.D.      | E 4  | 2085.93 | 0.9         | 5.39      |
| A 5  | 2011.53 | 0.19        | 1.16      | E 5  | 2044.73 | 0.75        | 4.59      |
| A 6  | 1977.73 | 0.97        | 6.16      | E 6  | 1918.43 | 0.15        | 1         |
| A 7  | 1827.43 | 0.24        | 1.65      | E 7  | 2015.73 | 0.36        | 2.24      |
| A 8  | 1900.63 | 1.02        | 6.7       | E 8  | 2044.83 | 0.59        | 3.63      |
| A 9  | 1929.43 | 0.61        | 3.97      | E 9  | 1890.53 | 0.18        | 1.2       |
| A10  | 1861.53 | 0.8         | 5.37      | E10  | 1866.73 | 0.78        | 5.21      |
| A11  | 2021.73 | 0.1         | 0.64      | E11  | 1818.63 | 0.61        | 4.2       |
| A12  | 1835.53 | 0.62        | 4.19      | E12  | 1874.73 | 0.32        | 2.14      |
| B 1  | 1904.43 | 0.51        | 3.36      | F 1  | 1877.53 | 1.09        | 7.28      |
| B 2  | 1977.63 | 0.23        | 1.48      | F 2  | 1946.53 | 1.05        | 6.74      |
| B 3  | 1874.53 | 0.86        | 5.75      | F 3  | 2048.93 | 1.05        | 6.4       |
| B 4  | 1826.43 | 0.35        | 2.39      | F 4  | 2020.73 | 0.63        | 3.88      |
| B 5  | 2085.63 | 0.2         | 1.17      | F 5  | 2099.93 | 0.61        | 3.65      |
| B 6  | 1880.73 | 0.66        | 4.37      | F 6  | 1983.73 | 0.84        | 5.3       |
| B 7  | 1890.43 | 0.59        | 3.92      | F 7  | 1983.73 | 0.58        | 3.67      |
| B 8  | 2124.73 | 0.4         | 2.36      | F 8  | 1805.53 | 0.26        | 1.8       |
| B 9  | 1879.53 | 0.53        | 3.54      | F 9  | 1830.53 | 0.47        | 3.19      |
| B10  | 2167.73 | 0.42        | 2.41      | F10  | 1838.53 | 0.61        | 4.17      |
| B11  | 1966.63 | 0.45        | 2.88      | F11  | 1842.43 | 0.07        | 0.49      |
| B12  | 1866.53 | 0.38        | 2.51      | F12  | 2015.83 | 0.23        | 1.45      |
| C 1  | 1946.63 | 0.29        | 1.83      | G 1  | 2008.63 | 0.29        | 1.8       |
| C 2  | 1989.73 | 0.63        | 3.96      | G 2  | 1892.63 | 0.27        | 1.78      |
| C 3  | 1975.73 | 0.86        | 5.47      | G 3  | 1905.73 | 0.51        | 3.35      |
| C 4  | 1921.63 | 0.89        | 5.77      | G 4  | 1874.63 | 0.28        | 1.87      |
| C 5  | 1913.53 | 0.13        | 0.86      | G 5  | 1779.43 | 1.2         | 8.46      |
| C 6  | 1882.33 | 0.46        | 3.06      | G 6  | 1809.43 | 0.5         | 3.47      |
| C 7  | 1859.63 | 1.03        | 6.92      | G 7  | 1996.73 | 1.07        | 6.72      |
| C 8  | 1912.53 | 0.68        | 4.43      | G 8  | 2023.63 | 0.55        | 3.37      |
| C 9  | 1964.83 | 0.61        | 3.91      | G 9  | 1842.63 | 0.15        | 1         |
| C10  | 1920.53 | 0.71        | 4.64      | G10  | 2029.73 | 0.71        | 4.34      |
| C11  | 1958.63 | 0.44        | 2.81      | G11  | 1936.53 | 0.44        | 2.85      |
| C12  | 1861.43 | 0.46        | 3.09      | G12  | 1889.53 | 0.37        | 2.47      |
| D 1  | 1987.63 | 0.86        | 5.41      | H 1  | 1885.43 | 0.09        | 0.57      |
| D 2  | 1961.53 | 0.82        | 5.25      | H 2  | 1785.63 | 0.14        | 0.97      |
| D 3  | 1971.63 | 0.81        | 5.15      | H 3  | 1963.73 | 0.79        | 5.01      |
| D 4  | 2111.63 | 0.21        | 1.22      | H 4  | 1938.63 | N.A.        | N.A.      |
| D 5  | 1864.53 | 0.38        | 2.52      | H 5  | 1662.53 | 0.42        | 3.16      |
| D 6  | 1913.43 | 0.11        | 0.69      | H 6  | 1942.73 | 0.37        | 2.41      |
| D 7  | 2018.73 | 0.67        | 4.17      | H 7  | 1903.43 | 0.12        | 0.82      |
| D 8  | 1991.83 | 0.34        | 2.12      | H 8  | 1926.63 | 0.4         | 2.61      |
| D 9  | 1905.43 | 0.11        | 0.7       | H 9  | 1915.63 | 0.54        | 3.49      |
| D10  | 1938.73 | 0.76        | 4.88      | H10  | 1851.53 | 0.44        | 2.99      |
| D11  | 2029.63 | 0.36        | 2.23      | H11  | 2006.73 | 0.58        | 3.62      |
| D12  | 1885.53 | 0.45        | 2.99      | H12  | 1954.43 | 0.48        | 3.07      |



**Table S3.** Calculated and observed molecular weights after NCL and desulfurization. Peptides in orange are double/non- desulfurized. Peptides in red were produced in non-quantifiable amounts and omitted from the FP-screen.

| Well | MW calculated | MW found | MW cal desulfurized | MW found | Yield (%) | Well | MW calculated | MW found | MW cal desulfurized | MW found | Yield (%) |
|------|---------------|----------|---------------------|----------|-----------|------|---------------|----------|---------------------|----------|-----------|
| A 1  | 12328.6       | 12329.2  | 12297.2             | 12296.4  | 1.52      | E 1  | 12349.6       | 12350.8  | 12318.8             | 12320.2  | 1.28      |
| A 2  | 12325.5       | 12326.2  | 12294.2             | 12294    | 3.76      | E 2  | 12349.5       | 12351.4  | 12319.4             | 12320.2  | 4.05      |
| A 3  | 12440.8       | 12441.4  | 12408.8             | 12409    | 1.18      | E 3  | 12374.7       | 12375.4  | 12343.4             | 12345    | 4.59      |
| A 4  | 12351.8       | 12352.2  | 12320.2             | 12320    | N.D.      | E 4  | 12505         | 12505.6  | 12473.6             | 12475.6  | 2.57      |
| A 5  | 12430.6       | 12431.2  | 12398.6             | 12398.8  | 0.81      | E 5  | 12463.8       | 12465.4  | 12433.4             | 12431.8  | 1.39      |
| A 6  | 12396.8       | 12397.4  | 12365.4             | 12365.2  | 2.39      | E 6  | 12337.5       | 12338.8  | 12306.8             | 12308.4  | 1.78      |
| A 7  | 12246.5       | 12247.4  | 12215.4             | 12182.6  | 2.64      | E 7  | 12434.8       | 12436.2  | 12404.2             | 12405    | 4.6       |
| A 8  | 12319.7       | 12320.2  | 12288.2             | 12288.2  | N.A.      | E 8  | 12463.9       | 12464.8  | 12432.8             | 12434.2  | 5.36      |
| A 9  | 12348.5       | 12349.4  | 12317.4             | 12316.8  | 3.14      | E 9  | 12309.6       | 12310.8  | 12278.8             | 12279.8  | N.A.      |
| A10  | 12280.6       | 12281.4  | 12249.4             | 12249    | 0.5       | E10  | 12285.8       | 12286.2  | 12254.2             | 12256    | 4.17      |
| A11  | 12440.8       | 12441.4  | 12409.4             | 12409    | N.A.      | E11  | 12237.7       | 12238.6  | 12206.6             | 12207.4  | 2.6       |
| A12  | 12254.6       | 12255    | 12223               | 12223    | 4.5       | E12  | 12293.8       | 12294.6  | 12262.6             | 12263.6  | 3.5       |
| B 1  | 12323.5       | 12324.2  | 12292.2             | 12294    | 4.78      | F 1  | 12296.6       | 12297.8  | 12265.8             | 12265    | 6.18      |
| B 2  | 12396.7       | 12397    | 12365               | 12366.6  | 1.08      | F 2  | 12365.6       | 12366.6  | 12334.6             | 12336    | 6.67      |
| B 3  | 12293.6       | 12294    | 12262               | 12263.6  | 6.04      | F 3  | 12468         | 12469    | 12437               | 12438.2  | 6.21      |
| B 4  | 12245.5       | 12246.2  | 12214.2             | 12215.8  | 4.72      | F 4  | 12439.8       | 12441    | 12409               | 12410    | 5.71      |
| B 5  | 12504.7       | 12505.4  | 12473.4             | 12474.6  | 0.83      | F 5  | 12519         | 12441.6  | 12409.6             | 12410.8  | 1.47      |
| B 6  | 12299.8       | 12300.4  | 12268.4             | 12269.6  | 4.95      | F 6  | 12402.8       | 12404.4  | 12372.4             | 12373.6  | 3.11      |
| B 7  | 12309.5       | 12310.8  | 12278.8             | 12279.6  | 2.73      | F 7  | 12402.8       | 12403.8  | 12371.8             | 12374    | 5.52      |
| B 8  | 12543.8       | 12544.6  | 12512.6             | 12514.2  | 3.18      | F 8  | 12224.6       | 12226.2  | 12194.2             | 12195.6  | 2.79      |
| B 9  | 12298.6       | 12300    | 12268               | 12268.8  | 3.4       | F 9  | 12249.6       | 12250.8  | 12218.8             | 12219.6  | 3.84      |
| B10  | 12586.8       | 12587.4  | 12555.4             | 12556.8  | 3.02      | F10  | 12257.6       | 12259    | 12227               | 12228.4  | 3.3       |
| B11  | 12385.7       | 12386.2  | 12354.2             | 12355.2  | 3.53      | F11  | 12261.5       | 12263    | 12231               | 12199.8  | N.A.      |
| B12  | 12285.6       | 12286.2  | 12254.2             | 12223.6  | 3.64      | F12  | 12434.9       | 12437    | 12405               | 12405.4  | 1.44      |
| C 1  | 12365.7       | 12366.4  | 12334.4             | 12336.2  | 4.74      | G 1  | 12427.7       | 12429.2  | 12397.2             | 12398.2  | 2.53      |
| C 2  | 12408.8       | 12409.4  | 12377.4             | 12378.8  | 6.04      | G 2  | 12311.7       | 12314    | 12282               | 12282.6  | 1.77      |
| C 3  | 12394.8       | 12396    | 12364               | 12365    | 4.46      | G 3  | 12324.8       | 12325.8  | 12293.8             | 12295.2  | 2.34      |
| C 4  | 12340.7       | 12342    | 12310               | 12310.8  | 4.88      | G 4  | 12293.7       | 12295.2  | 12263.2             | 12265    | 2.58      |
| C 5  | 12332.6       | 12333    | 12301               | 12301.8  | 1.21      | G 5  | 12198.5       | 12198    | 12166               | 12166.4  | 2.44      |
| C 6  | 12301.4       | 12302.8  | 12270.8             | 12272    | 4.74      | G 6  | 12228.5       | 12229.8  | 12197.8             | 12199.6  | 2.63      |
| C 7  | 12278.7       | 12279.2  | 12247.2             | 12248.6  | 1.29      | G 7  | 12415.8       | N.A.     | 12383.8             | 12399.6  | 0.35      |
| C 8  | 12331.6       | 12332    | 12300               | 12301.4  | 2.71      | G 8  | 12442.7       | 12443.8  | 12411.8             | 12414.2  | 2.2       |
| C 9  | 12383.9       | 12385    | 12353               | 12353.6  | 1.81      | G 9  | 12261.7       | 12262.4  | 12230.4             | 12200    | 1.21      |
| C10  | 12339.6       | 12340.4  | 12308.4             | 12309.8  | 6.3       | G10  | 12448.8       | 12449.6  | 12417.6             | 12419.4  | 1.75      |
| C11  | 12377.7       | 12378.2  | 12346.2             | 12347    | 1.6       | G11  | 12355.6       | 12357.2  | 12325.2             | 12326.4  | 2.4       |
| C12  | 12280.5       | 12281.2  | 12249.2             | 12251    | 4.36      | G12  | 12308.6       | 12310.6  | 12278.6             | 12280.4  | 2.87      |
| D 1  | 12406.7       | 12407.6  | 12375.6             | 12377.2  | 5.64      | H 1  | 12304.5       | 12306.2  | 12274.2             | 12244    | N.A.      |
| D 2  | 12380.6       | 12381    | 12349               | 12350.6  | 6.21      | H 2  | 12204.7       | 12205.4  | 12173.4             | 12143.2  | 0.82      |
| D 3  | 12390.7       | 12391.6  | 12359.6             | 12393.2  | N.A.      | H 3  | 12382.8       | 12384.2  | 12352.2             | 12353.8  | 3.09      |
| D 4  | 12530.7       | N.A.     | 12498.7             | N.A.     | N.A.      | H 4  | 12357.7       | N.A.     | 12325.7             | N.A.     | N.A.      |
| D 5  | 12283.6       | 12284.4  | 12252.4             | 12254    | 3.37      | H 5  | 12081.6       | 12083.2  | 12051.2             | 12052.8  | 3.69      |
| D 6  | 12332.5       | 12333.4  | 12301.4             | 12303.2  | N.A.      | H 6  | 12361.8       | 12363    | 12331               | 12332    | 2.83      |
| D 7  | 12437.8       | 12438.6  | 12406.6             | 12408.2  | N.A.      | H 7  | 12322.5       | 12324.4  | 12292.4             | 12294.2  | N.A.      |
| D 8  | 12410.9       | 12411.8  | 12379.8             | 12379    | 4.16      | H 8  | 12345.7       | 12346.8  | 12314.8             | 12316.2  | 2.30      |
| D 9  | 12324.5       | 12325.8  | 12293.8             | 12295.2  | N.A.      | H 9  | 12334.7       | 12336    | 12304               | 12305.4  | 2.03      |
| D10  | 12357.8       | 12359.2  | 12327.2             | 12327.8  | 1.37      | H10  | 12270.6       | 12272.4  | 12240.4             | 12241.8  | 1.35      |
| D11  | 12448.7       | 12450    | 12418               | 12419.6  | 3.21      | H11  | 12425.8       | 12428    | 12396               | 12397    | 4.45      |
| D12  | 12304.6       | 12305.6  | 12273.6             | 12275    | 4.47      | H12  | 12373.5       | 12376.2  | 12344.2             | 12345.4  | 5.18      |

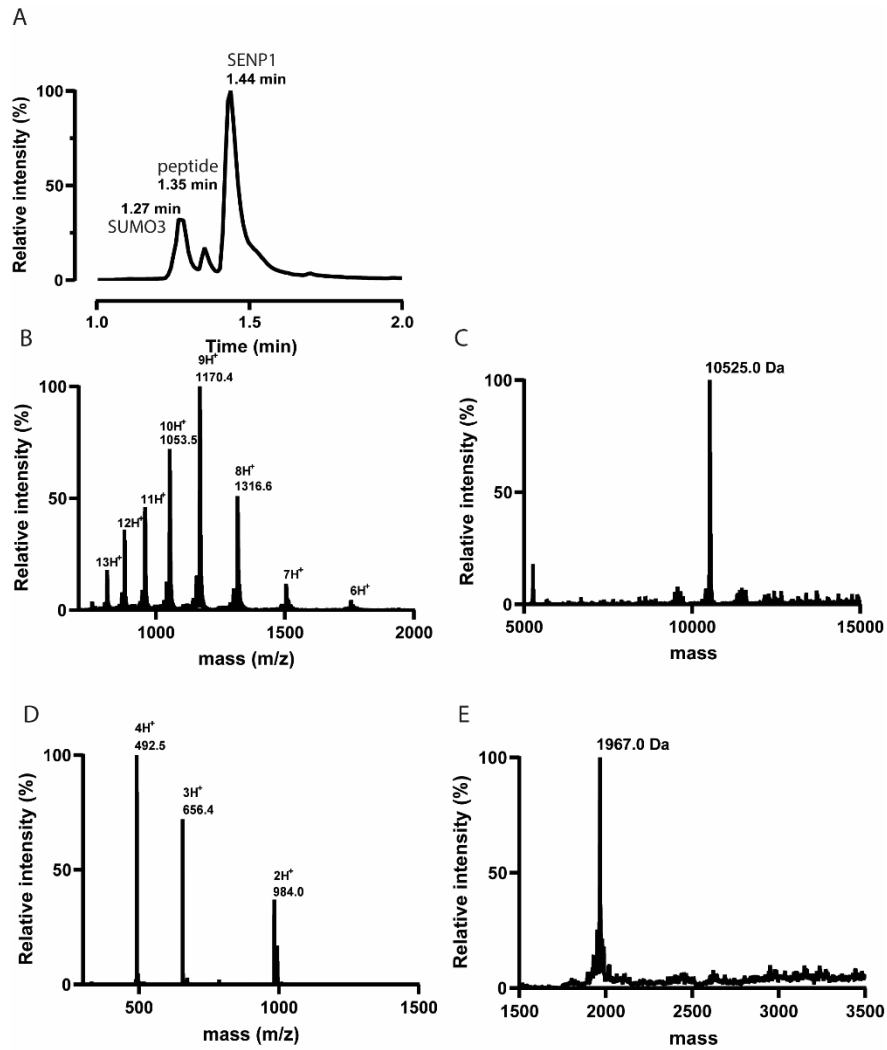

**Figure S2.** Determination of site of desulfurization on SUMO3-peptide conjugate E4. **A.** Total ion spectrum of E4 deconjugation by SENP1, **B.** ESI spectrum of SUMO3 (1.27 min). Calculated Mass (average isotope composition):  $[M + 8H]^{8+}$ : 1316.5,  $[M + 9H]^{9+}$ : 1170.4,  $[M + 10H]^{10+}$ : 1053.4, , observed:  $[M + 8H]^{8+}$ : 1316.5,  $[M + 9H]^{9+}$ : 1170.4,  $[M + 10H]^{10+}$ : 1053.5, **C.** Deconvoluted mass of SUMO3. Calculated: 10524.8, observed: 10525.0. **D.** ESI spectrum of peptide E4 (1.35 min). Calculated Mass (average isotope composition):  $[M + 2H]^{2+}$ : 984.5,  $[M + 3H]^{3+}$ : 656.7,  $[M + 4H]^{4+}$ : 492.8, Observed:  $[M + 2H]^{2+}$ : 984.0,  $[M + 3H]^{3+}$ : 656.4,  $[M + 4H]^{4+}$ : 492.5, **E.** Deconvoluted mass of peptide E4 corresponding to TMR-PEG2-DNFFIKKEQIK ;  $C_{97}H_{135}N_{19}O_{25}$ . Calculated: 1967.2, observed: 1967.0.

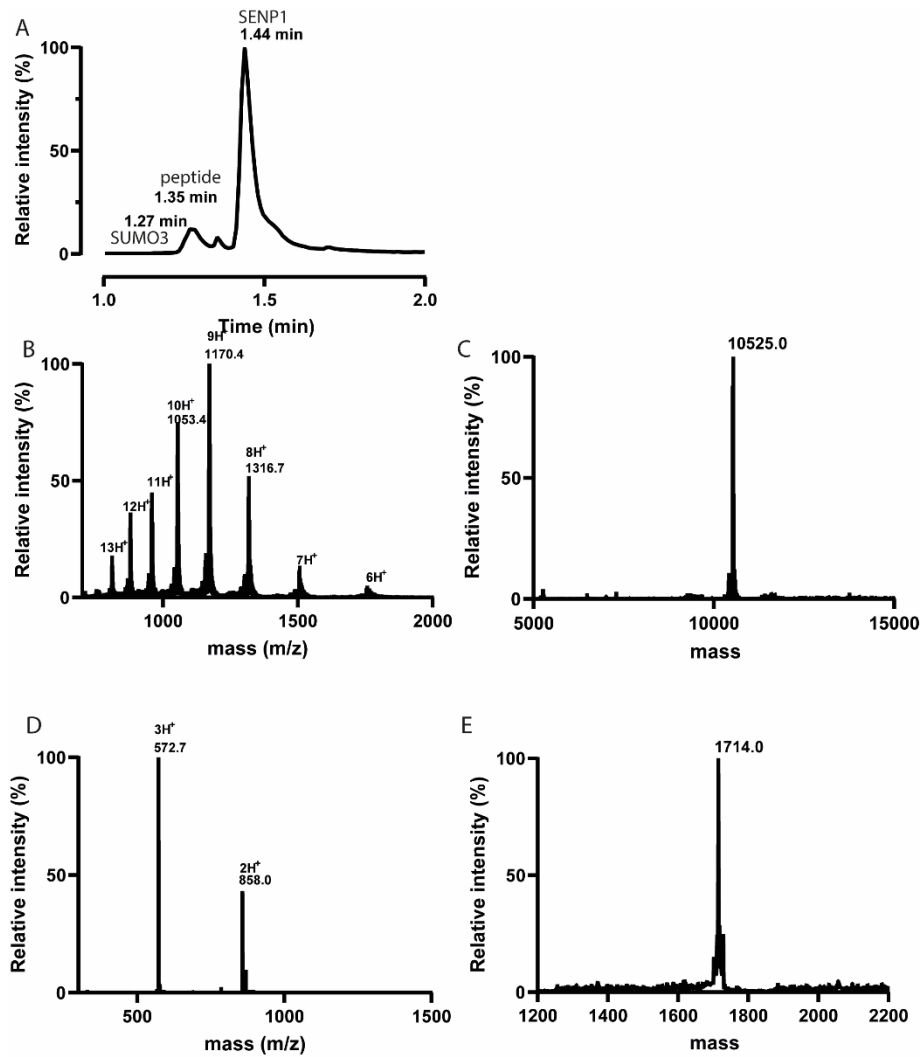

**Figure S3.** Determination of site of desulfurization on SUMO3-peptide conjugate B12. **A.** Total ion spectrum of B12 deconjugation by SENP1. **B.** ESI spectrum of SUMO3 (1.27 min). Calculated Mass (average isotope composition):  $[M + 8H]^{8+}$ : 1316.5,  $[M + 9H]^{9+}$ : 1170.4,  $[M + 10H]^{10+}$ : 1053.4, , observed:  $[M + 8H]^{8+}$ : 1316.7,  $[M + 9H]^{9+}$ : 1170.4,  $[M + 10H]^{10+}$ : 1053.4. **C.** Deconvoluted mass of SUMO3. Calculated: 10524.8, observed: 10525.0 **D.** ESI spectrum of peptide B12 (1.35 min). Calculated Mass (average isotope composition):  $[M + 2H]^{2+}$ : 858.4,  $[M + 3H]^{3+}$ : 572.6, Observed:  $[M + 2H]^{2+}$ : 858.0,  $[M + 3H]^{3+}$ : 572.7. **E.** Deconvoluted mass of peptide B12 corresponding to TMR-PEG2-LGETAKSEPVK ;  $C_{81}H_{118}N_{16}O_{25}$ . Calculated: 1715.9, observed: 1714.0.

### Synthesis of TMR-K<sup>SUMO3</sup>G

TMR-K<sup>SUMO3</sup>G was synthesized as previously described by Geurink et al. In short, peptide **1** (3.22 mg, 0.3  $\mu$ mol) and TMR-thioKG (1.11 mg, 1.5  $\mu$ mol) were dissolved in 6 M Gdn HCl, pH 7.4 (300  $\mu$ L). Followed by the addition of Mesna and TCEP to a final concentration of 100 mM and 25 mM. The reaction was placed in a thermoblock/shaker at 37 °C and reacted for 16 hours. After LC-MS analysis showed that the reaction had reached completion, TCEP and VA-044 were added to a final concentration of 250 mM and 25 mM. The reaction was further incubated at 40 °C and allowed to react for 16 hours. The crude reaction mixture was purified by RP-HPLC using a Phenomenex, Luna 100 Å, C8(2), 10  $\mu$ m, 30 mm x 250 mm column (18–40 % B over 20 min, flow 30 mL/min) and lyophilized to afford the desired peptide as a pink solid (0.8 mg, 24.0 yield%).

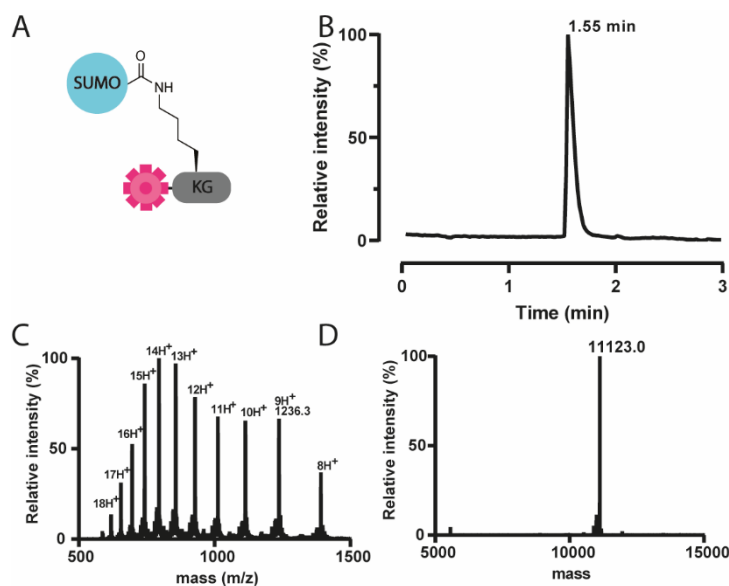

**Figure S4.** **A.** Schematic representation of TMR-K<sup>SUMO3</sup>G. **B.** Total ion spectrum of SUMO3 TMRKG, Rt 1.55 min. **C.** ESI spectrum of purified SUMO3 K48 TMRKG. Calculated Mass (average isotope composition): 11115.46; [M + 7H]<sup>7+</sup>: 1588.92, [M + 8H]<sup>8+</sup>: 1390.43, [M + 9H]<sup>9+</sup>: 1236.05, [M + 10H]<sup>10+</sup>: 1112.55, [M + 11H]<sup>11+</sup>: 1011.50, [M + 12H]<sup>12+</sup>: 927.28, [M + 13H]<sup>13+</sup>: 856.04. Observed: 11117.6; [M + 7H]<sup>7+</sup>: 1589.23, [M + 8H]<sup>8+</sup>: 1390.5, [M + 9H]<sup>9+</sup>: 1236.29, [M + 10H]<sup>10+</sup>: 1112.57, [M + 11H]<sup>11+</sup>: 1011.58, [M + 12H]<sup>12+</sup>: 927.55, [M + 13H]<sup>13+</sup>: 856.12. **D.** Deconvoluted mass of SUMO3 TMRKG. Calculated: 11122.4, observed: 11123.0.

### Assembly of the SUMO probes

Peptides were dissolved in 1M TCEP (10% of the final volume) and incubated at RT for 30 minutes to remove the StBu protection group from the  $\gamma$ -thiolysine prior to the NCL. Thereafter, followed by the addition of SUMO3 thioester (90 % of the final volume) in 0.2 M Na<sub>2</sub>HPO<sub>4</sub>, 250 mM MESNa and 0.15 M NaCl pH 7.95 buffer, leading to a final concentration of 1 mM SUMO3. The NCL was shaken at 37 °C for 16 hours before LC-MS analysis was taken of all reactions. Followed by the addition of an equal amount of 0.2 M Na<sub>2</sub>HPO<sub>4</sub>, 500 mM TCEP and 50 mM VA-044 in MilliQ, resulting in a final buffer concentration of 0.2 M Na<sub>2</sub>HPO<sub>4</sub>, 250 mM TCEP, 125 mM MESNa and 25 mM VA-044 in MilliQ. The reaction was shaken at 350 rpm at 40 °C for 16 hours before LC-MS analysis was taken of all reactions. The volumes of purified each reaction were adjusted to 1 mL per well before purification by semi-preparative HPLC using a Phenomenex, Aeris™ widepore 200 Å, C4, 3.6  $\mu$ m, 4.6 x 150 mm column followed by lyophilization afforded 83 peptides as pink solids with yields ranging from 0.2 % to 6.6 % with an average yield of 3.2 %.

**Table S4.** Final concentrations of SENPs in the FP assay.

| Enzyme        | SEN1  | SEN2  | SEN5   | SEN6   | SEN7 |
|---------------|-------|-------|--------|--------|------|
| Concentration | 20 pM | 30 pM | 200 pM | 2.5 nM | 2 nM |

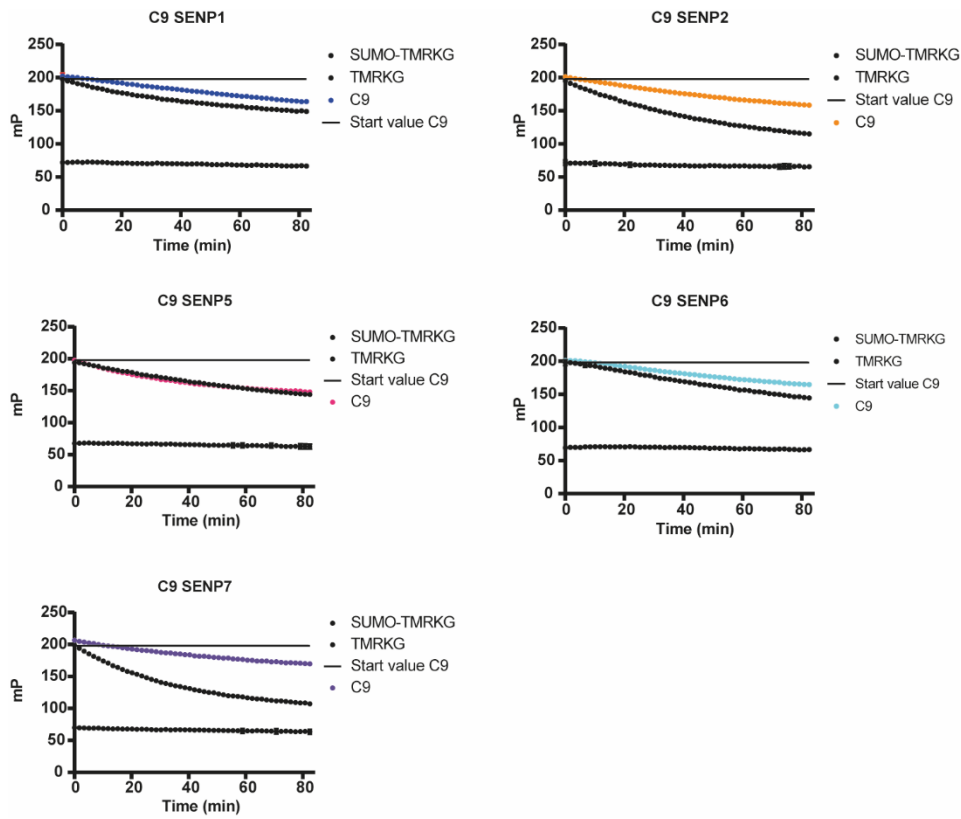

Figure S5. Reaction time-course of probe C9 with SENP1, SENP2, SENP5, SENP6 and SENP7.

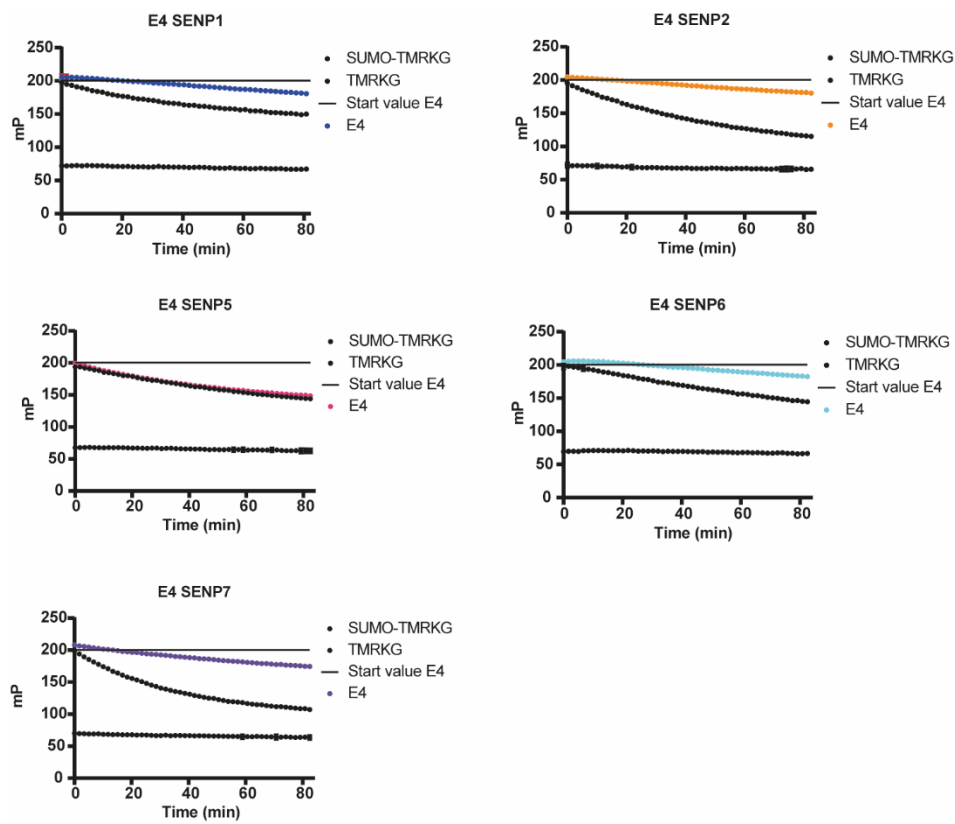

Figure S6. Reaction time-course of probe E4 with SENP1, SENP2, SENP5, SENP6 and SENP7.

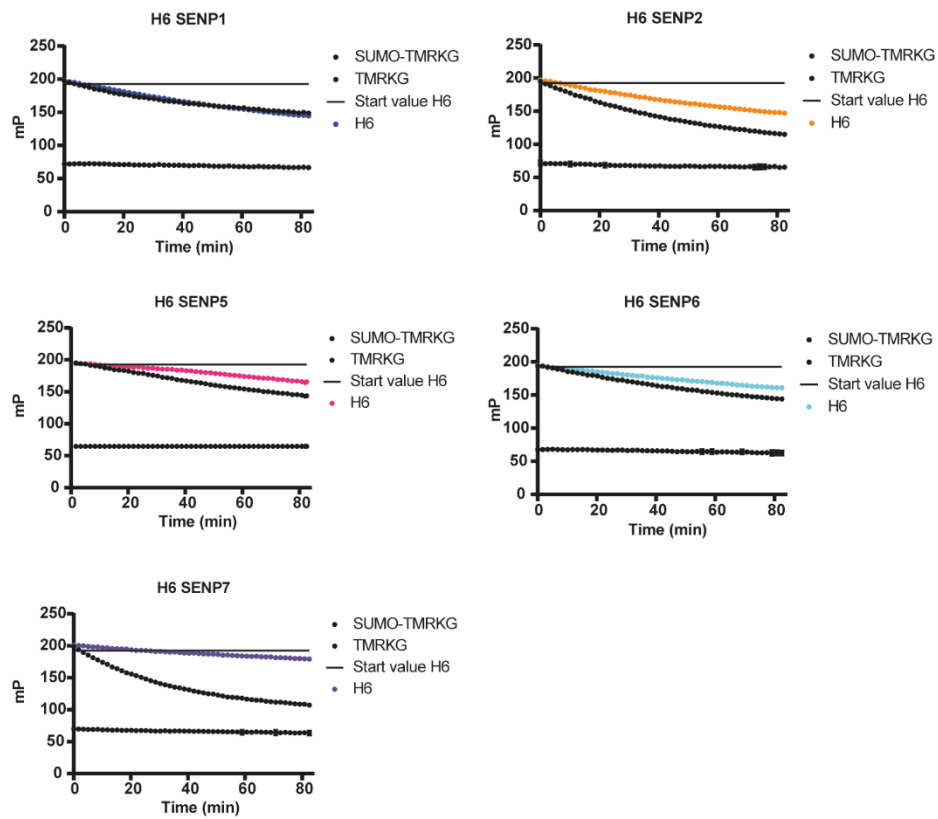

**Figure S7.** Reaction time-course of probe **H6** with SENP1, SENP2, SENP5, SENP6 and SENP7.

Table S5. Normalized data of the FP assay in %.

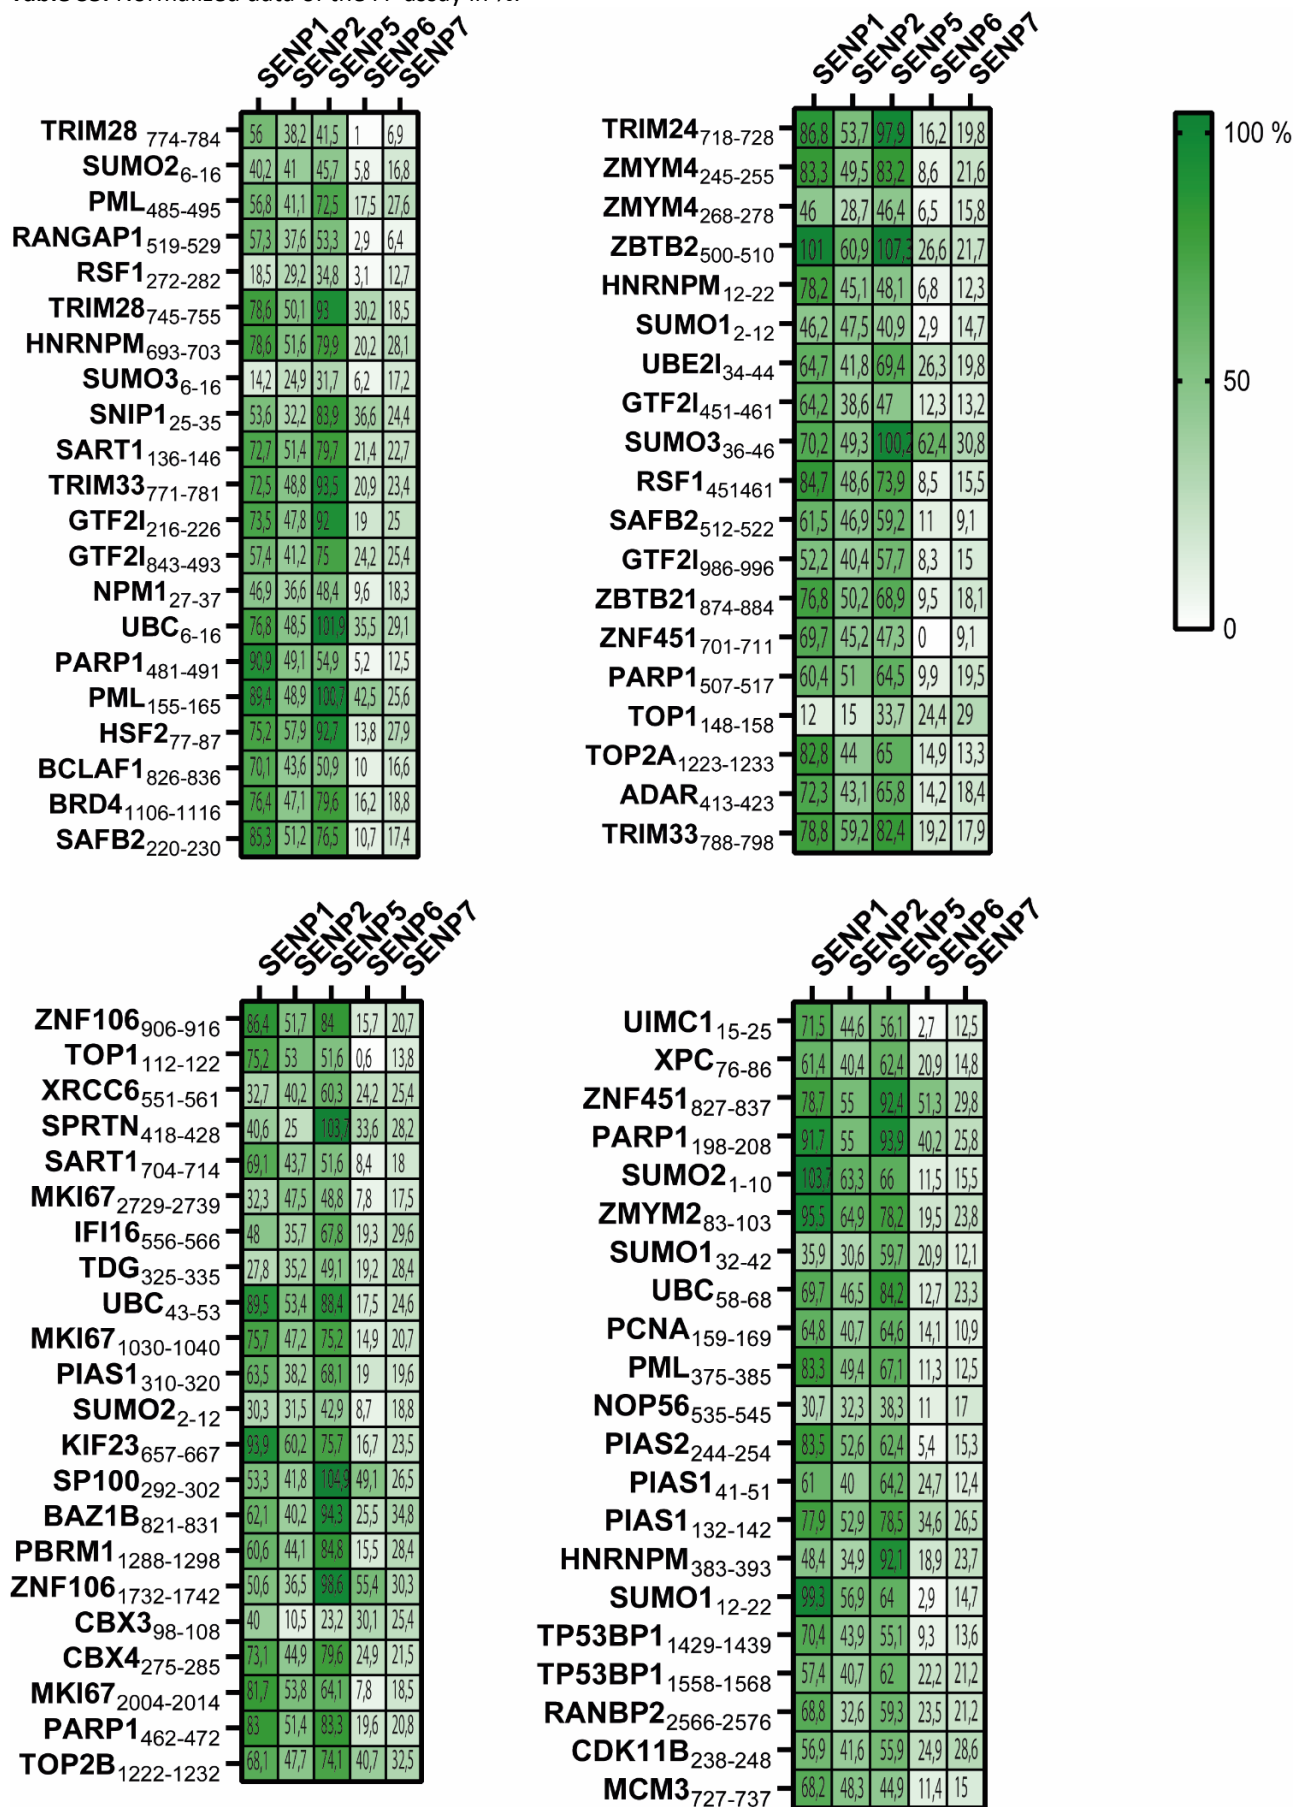

## Concentration dependent FP assay

A

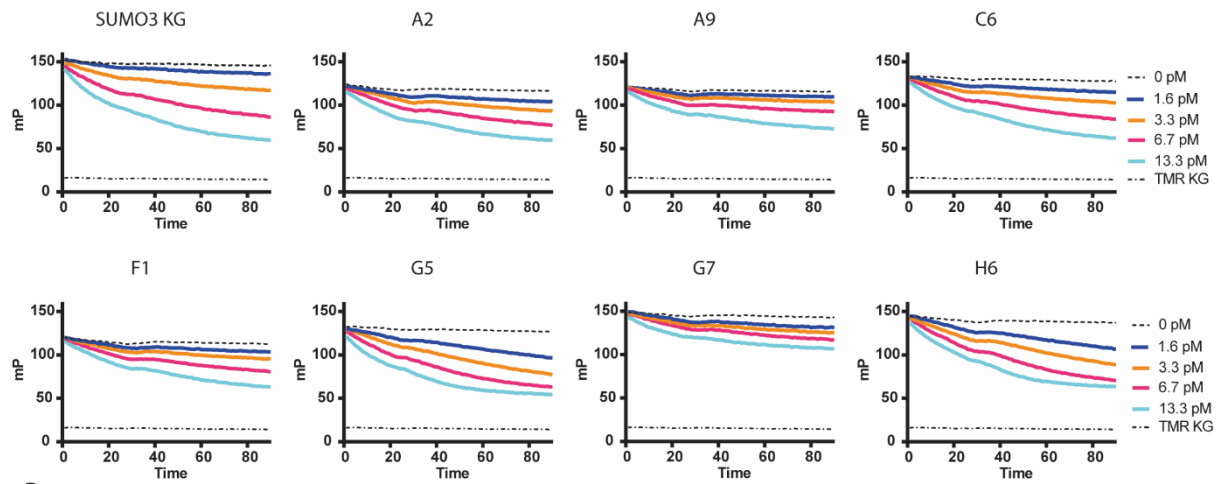

B

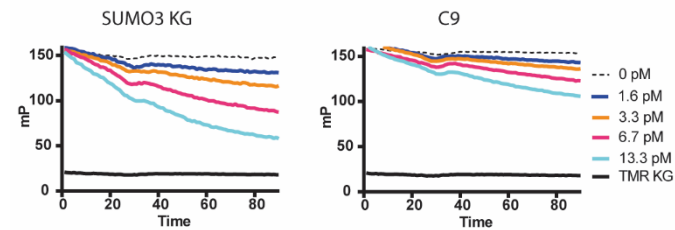

**Figure S8. A.** Time-course of probes **A2**, **A9**, **C6**, **F1**, **G5**, **G7**, **H6** and reference **SUMO TMR-KG** by increasing concentrations of **SENP1**. **B.** Time-course of probes **C9** and reference **SUMO TMR-KG** by increasing concentrations of **SENP1**.

A

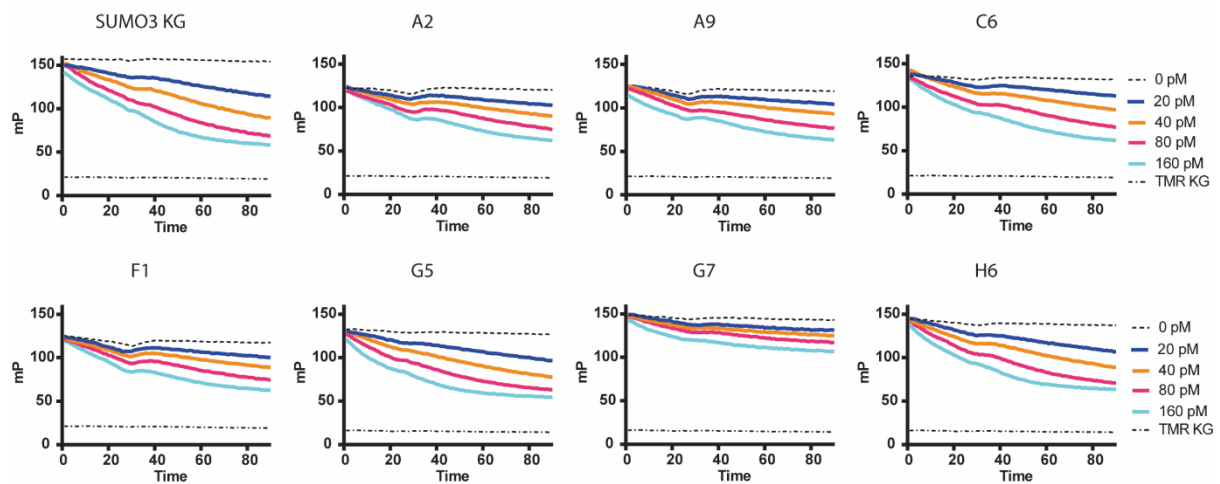

B

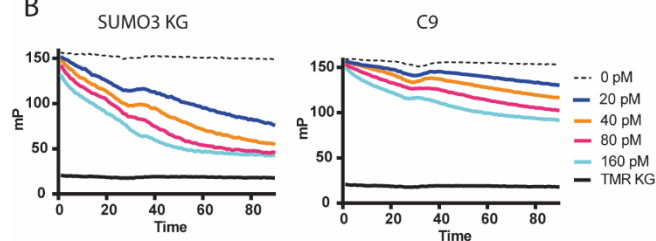

**Figure S9. A.** Time-course of probes **A2**, **A9**, **C6**, **F1**, **G5**, **G7**, **H6** and reference **SUMO TMR-KG** by increasing concentrations of **SENP2**. **B.** Time-course of probes **C9** and reference **SUMO TMR-KG** by increasing concentrations of **SENP2**.



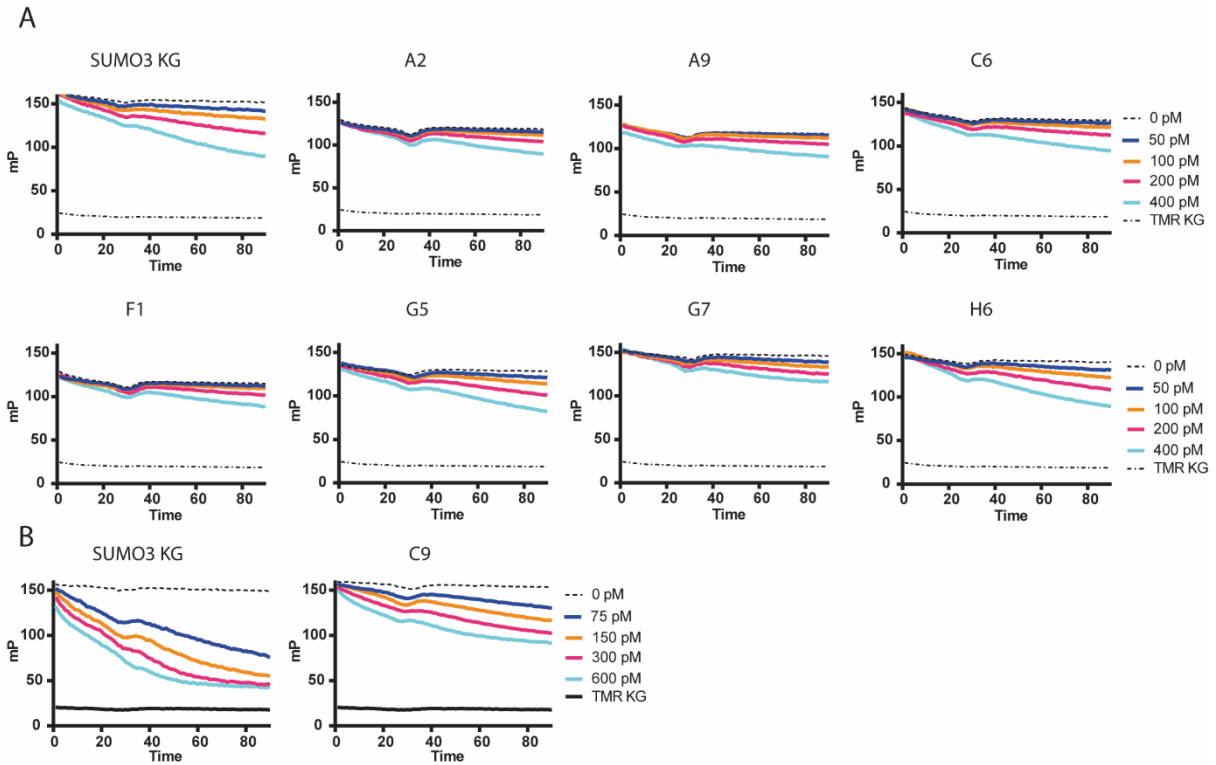

**Figure S10. A.** Time-course of probes **A2**, **A9**, **C6**, **F1**, **G5**, **G7**, **H6** and reference **SUMO TMR-KG** by increasing concentrations of **SENP5**. **B.** Time-course of probes **C9** and reference **SUMO TMR-KG** by increasing concentrations of **SENP5**.

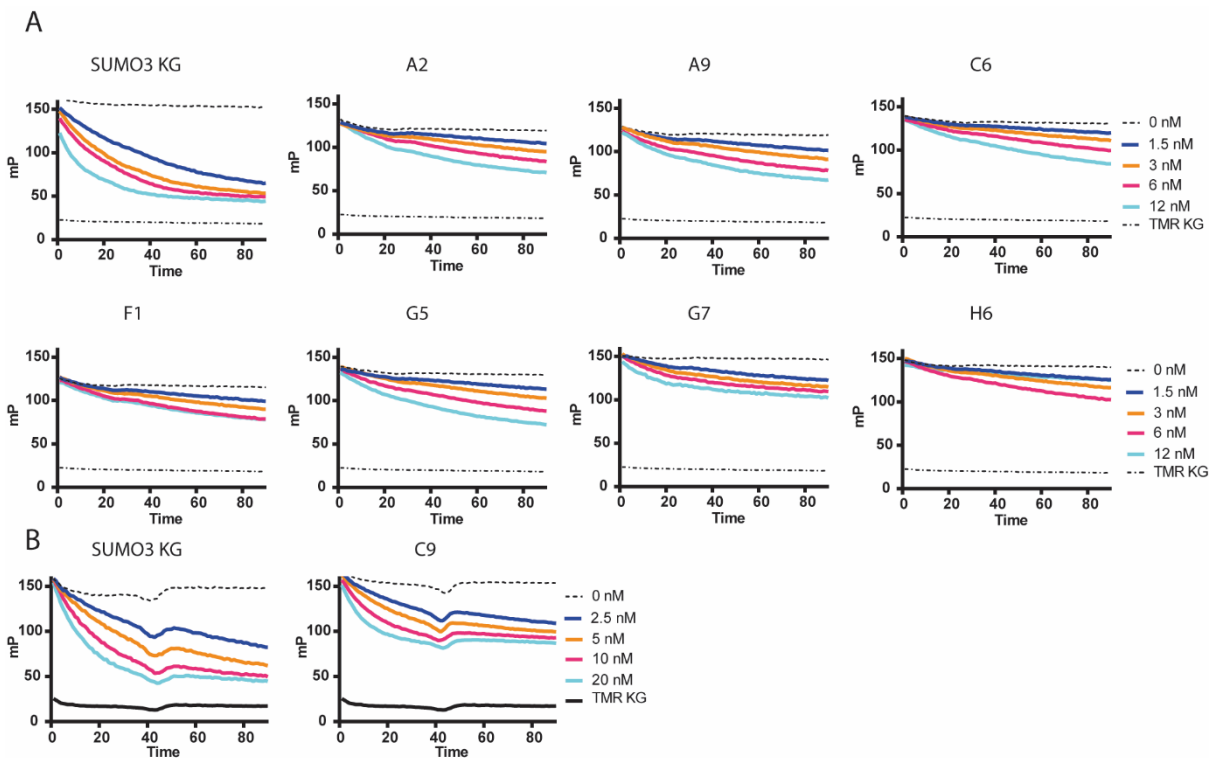

**Figure S11. A.** Time-course of probes **A2**, **A9**, **C6**, **F1**, **G5**, **G7**, **H6** and reference **SUMO TMR-KG** by increasing concentrations of **SENP6**. **B.** Time-course of probes **C9** and reference **SUMO TMR-KG** by increasing concentrations of **SENP6**.

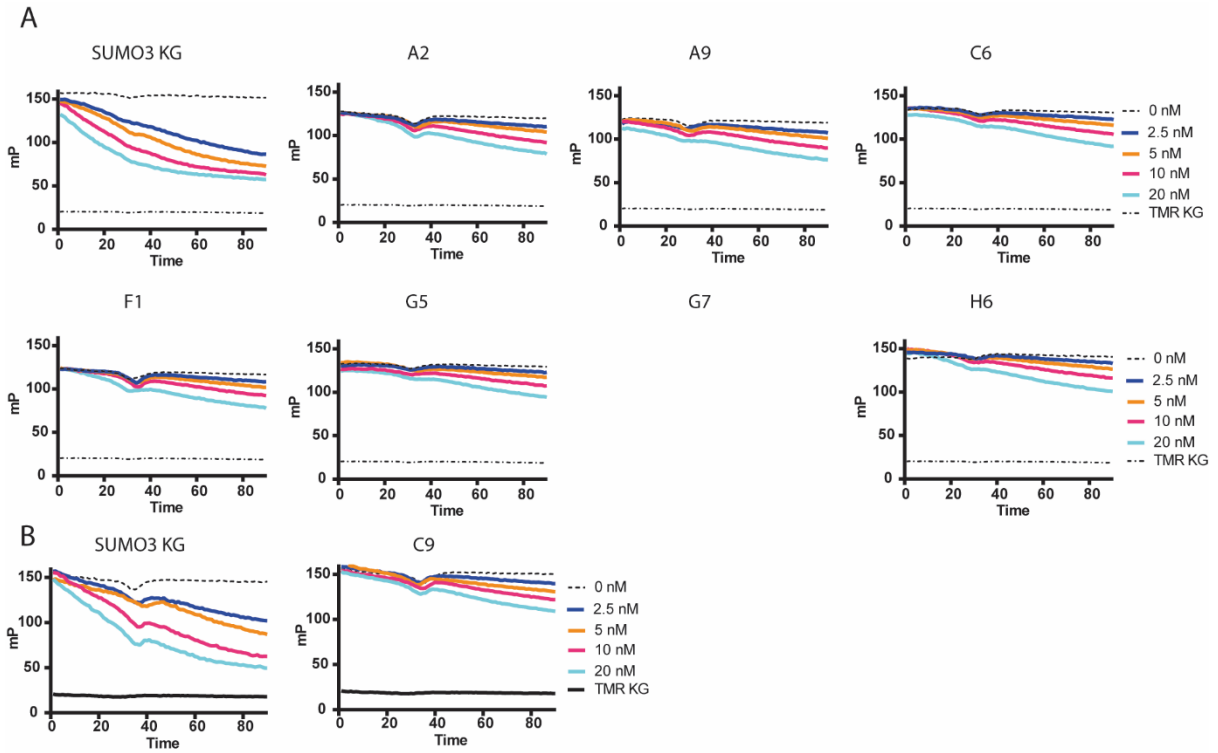

**Figure S12. A.** Time-course of probes **A2**, **A9**, **C6**, **F1**, **G5**, **G7**, **H6** and reference **SUMO TMR-KG** by increasing concentrations of SENP7. **B.** Time-course of probes **C9** and reference **SUMO TMR-KG** by increasing concentrations of SENP7.

## Sequences:

### SUMO3 sequence

1 MSEEKPKEGV KTENDHINLK VAGQDGSVVQ  
31 FKIKRHTPLS KLMKAYCERQ GLSMRQIRFR  
61 FDGQPINETD TPAQLEMEDE DTIDVFQQQT GG

### SUMO2 sequence

1 MADEKPKEGV K TENNDHINL KVAGQDGSVV  
31 QFKIKRHTPL SKLMKAYCER QGLSMRQIRF  
61 RFDGQPINET DTPAQLEMED EDTIDVFQQQ TGG

### SUMO1 sequence

1 MSDQEAKPST EDLGDKKEGE YIKLKVIGQD  
31 SSEIHFKVKM TTHLKCLKES YCQRQGVPMN  
61 SLRFLFEGQR IADNHTPKEL GMEEDVIEV YQEQTGG

Table S6. Amino acids sequences of SUMO1,2 and 3

| NAME      | SEQUENCE                                                                                        |
|-----------|-------------------------------------------------------------------------------------------------|
| SUMO3     | MSEEKPKEGVKTENDHINLKVAGQDGSVVQFKIKRHTPLSKLMKAYCERQGLSMRQIRFRFDGQPINETDTPAQLEMEDEDTIDVFQQQTGG    |
| SUMO1 K7  | XSDQEAZPSTEDLGDKKEGEYIKLKVIGQDSSEIHFKVKXTTHLKCLKESYSQRQGVPNLSRFLFEGQRIADNHTPKELGXEEDVIEVYQEQTGG |
| SUMO1 K17 | XSDQEAKPSTEDLGDKZEGEYIKLKVIGQDSSEIHFKVKXTTHLKCLKESYSQRQGVPNLSRFLFEGQRIADNHTPKELGXEEDVIEVYQEQTGG |
| SUMO1 K37 | XSDQEAKPSTEDLGDKKEGEYIKLKVIGQDSSEIHFZVKXTTHLKCLKESYSQRQGVPNLSRFLFEGQRIADNHTPKELGXEEDVIEVYQEQTGG |
| SUMO2 K11 | XADEKPKEGVZTENNDHINLKVAGQDGSVVQFKIKRHTPLSKLKAYSERQGLSRQIRFRFDGQPINETDTPAQLEXEDEDTIDVFQQQTGG     |
| SUMO3 K11 | XSEEKPKEGVZTENDHINLKVAGQDGSVVQFKIKRHTPLSKLKAYSERQGLSRQIRFRFDGQPINETDTPAQLEXEDEDTIDVFQQQTGG      |
| SUMO3 K41 | XSEEKPKEGVKTENDHINLKVAGQDGSVVQFKIKRHTPLSZLXKAYSERQGLSRQIRFRFDGQPINETDTPAQLEXEDEDTIDVFQQQTGG     |

X was incorporated as Fmoc-norleucine-OH and Z was incorporated as  $\gamma$ -thiolysine. Underlined dipeptide sequences were coupled as the respective pseudoproline dipeptides or DMB dipeptides.

Table S7. Amino acids sequences of SUMO1,2 and 3 with the corresponding dipeptides and special amino acids used in SPPS indicated.

## Synthesis of SUMO1 derivates (SUMO1 thiolysine K7, K17 and K37)

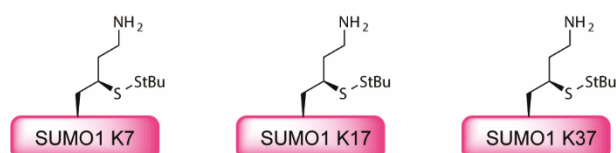

The synthesis was performed following general procedures (method 2) using 2-chlorotriyl resin (0.11 gram, 0.18 mmol/gram). The peptide was cleaved from the resin according to the general procedures and purified by RP-HPLC using a Phenomenex, Luna 100 Å, C8(2), 10  $\mu$ m, 30 mm x 250 mm column (18-40 % B over 20 min, flow 30 mL/min) and lyophilized to afford the desired peptide as a white solid.

SUMO1 K7 thiolysine: 9.24 mg, 0.83  $\mu$ mol, 4.2 % yield.

SUMO1 K17 thiolysine: 9.71 mg, 0.87  $\mu$ mol, 4.4 % yield.

SUMO1 K37 thiolysine: 10.7 mg, 0.96  $\mu$ mol, 4.8 % yield.

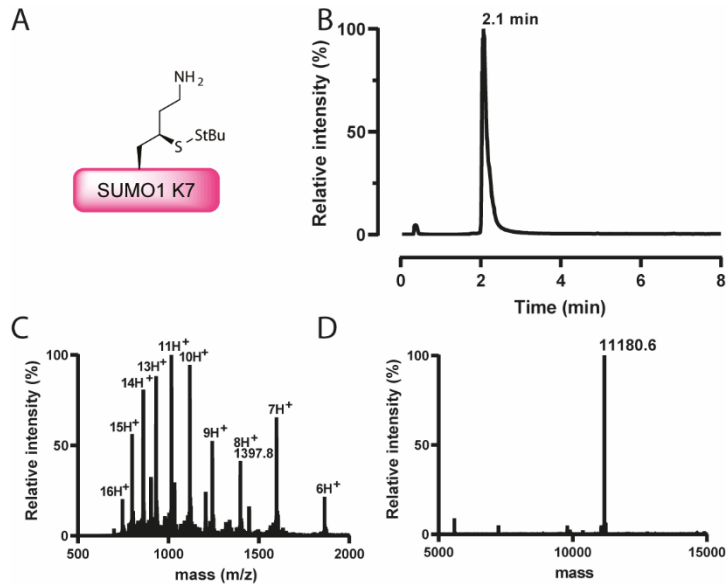

**Figure S13. A.** Schematic representation of SUMO1 K17 thiolysine. **B.** Total ion spectrum of SUMO1 K17 thiolysine, Rt 2.1 min. **C.** ESI spectrum of purified SUMO1 K17 thiolysine. Calculated Mass (average isotope composition): 11173.68;  $[M + 6H]^{6+}$ : 1863.28,  $[M + 7H]^{7+}$ : 1597.24,  $[M + 8H]^{8+}$ : 1397.71,  $[M + 9H]^{9+}$ : 1242.52,  $[M + 10H]^{10+}$ : 1118.37,  $[M + 11H]^{11+}$ : 1016.79,  $[M + 12H]^{12+}$ : 932.14,  $[M + 13H]^{13+}$ : 860.51. Observed: 11174.58;  $[M + 6H]^{6+}$ : 1863.43,  $[M + 7H]^{7+}$ : 1597.38,  $[M + 8H]^{8+}$ : 1397.84,  $[M + 9H]^{9+}$ : 1242.63,  $[M + 10H]^{10+}$ : 1118.47,  $[M + 11H]^{11+}$ : 1016.89,  $[M + 12H]^{12+}$ : 932.23,  $[M + 13H]^{13+}$ : 860.59. **D.** Deconvoluted mass of SUMO1 K17 thiolysine. Calculated: 11180.5, observed: 11180.6.

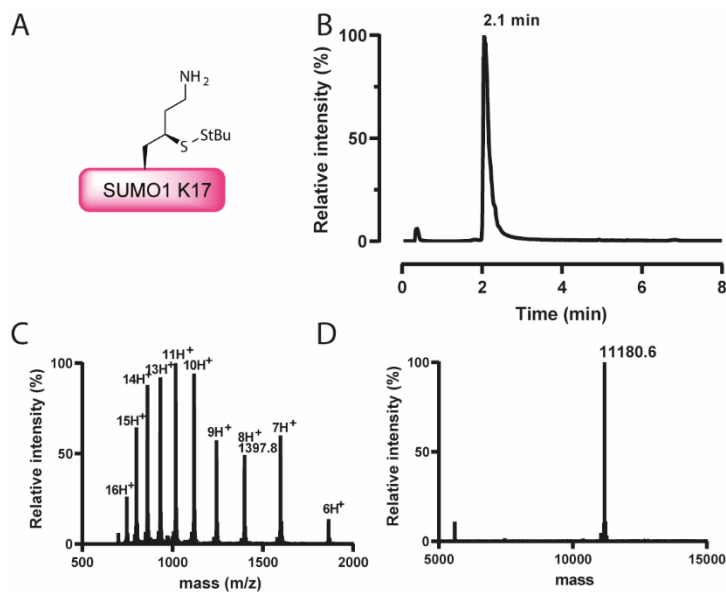

**Figure S14. A.** Schematic representation of SUMO1 K17 thiolysine. **B.** Total ion spectrum of SUMO1 K17 thiolysine, Rt 2.1 min. **C.** ESI spectrum of purified SUMO1 K17 thiolysine. Calculated Mass (average isotope composition): 11173.68;  $[M + 6H]^{6+}$ : 1863.28,  $[M + 7H]^{7+}$ : 1597.24,  $[M + 8H]^{8+}$ : 1397.71,  $[M + 9H]^{9+}$ : 1242.52,  $[M + 10H]^{10+}$ : 1118.37,  $[M + 11H]^{11+}$ : 1016.79,  $[M + 12H]^{12+}$ : 932.14,  $[M + 13H]^{13+}$ : 860.51. Observed: 11174.58;  $[M + 6H]^{6+}$ : 1863.43,  $[M + 7H]^{7+}$ : 1597.38,  $[M + 8H]^{8+}$ : 1397.84,  $[M + 9H]^{9+}$ : 1242.63,  $[M + 10H]^{10+}$ : 1118.47,  $[M + 11H]^{11+}$ : 1016.89,  $[M + 12H]^{12+}$ : 932.23,  $[M + 13H]^{13+}$ : 860.59. **D.** Deconvoluted mass of SUMO1 K17 thiolysine. Calculated: 11180.5, observed: 11180.6.

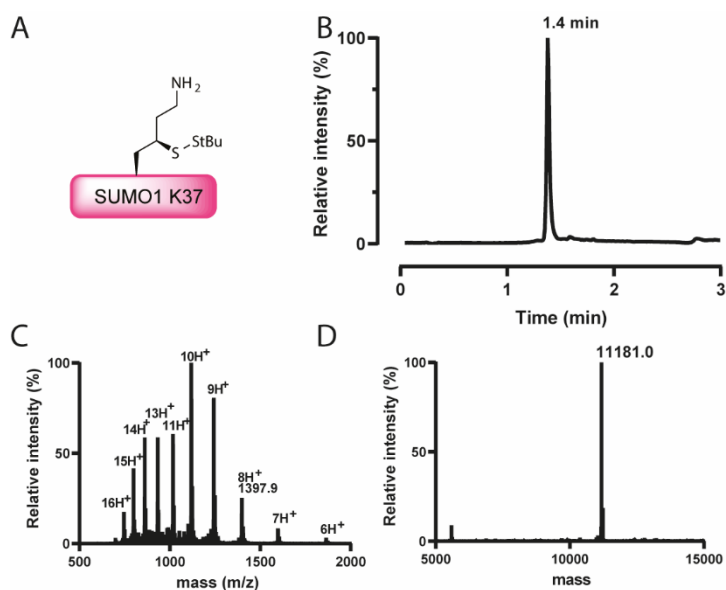

**Figure S15.** **A.** Schematic representation of SUMO1 K37 thiolysine. **B.** Total ion spectrum of SUMO1 K37 thiolysine, Rt 1.4 min. **C.** ESI spectrum of purified SUMO1 K37 thiolysine. Calculated Mass (average isotope composition): 11173.68;  $[M + 6H]^{6+}$ : 1863.28,  $[M + 7H]^{7+}$ : 1597.24,  $[M + 8H]^{8+}$ : 1397.71,  $[M + 9H]^{9+}$ : 1242.52,  $[M + 10H]^{10+}$ : 1118.37,  $[M + 11H]^{11+}$ : 1016.79,  $[M + 12H]^{12+}$ : 932.14,  $[M + 13H]^{13+}$ : 860.51. Observed: 11175.3;  $[M + 6H]^{6+}$ : 1863.55,  $[M + 7H]^{7+}$ : 1597.46,  $[M + 8H]^{8+}$ : 1397.91,  $[M + 9H]^{9+}$ : 1242.71,  $[M + 10H]^{10+}$ : 1118.43,  $[M + 11H]^{11+}$ : 1016.94,  $[M + 12H]^{12+}$ : 932.29,  $[M + 13H]^{13+}$ : 860.64. **D.** Deconvoluted mass of SUMO1 K37 thiolysine. Calculated: 11180.5, observed: 11181.0.

### Synthesis of SUMO2 thiolysine K11

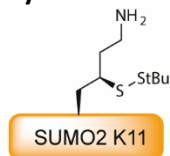

The synthesis was performed following general procedures (method 2) using 2-chlorotriyl resin (0.11 gram, 0.18 mmol/gram). The protected polypeptide was cleaved from the resin by treatment with 3 x 5 mL of DCM/TFE 3:1 v/v for 1 hour and followed by filtration. The combined filtrates were concentrated *in vacuo* and co-evaporated with DCE 3x and dried under high vacuum. The protected peptide (1 equiv.) was dissolved in DCM (10 mL) and methyl 3-mercaptopropionate (8.8  $\mu$ L, 80  $\mu$ mol, 4 equiv.) was coupled using PyAOP (42 mg, 80  $\mu$ mol, 4 equiv.) and DIPEA (27.8  $\mu$ L, 160  $\mu$ mol, 8 equiv.) for 16 hours. Thereafter, the solvents were removed *in vacuo* and the protecting groups was cleaved according to the general procedures. The crude peptide was purified by RP-HPLC using Phenomenex, Luna 100 Å, C8(2), 10  $\mu$ m, 30 mm x 250 mm column (18-40 % B over 20 min, flow 30 mL/min) and lyophilized to afford the desired peptide (16.28 mg, 7.65% yield).

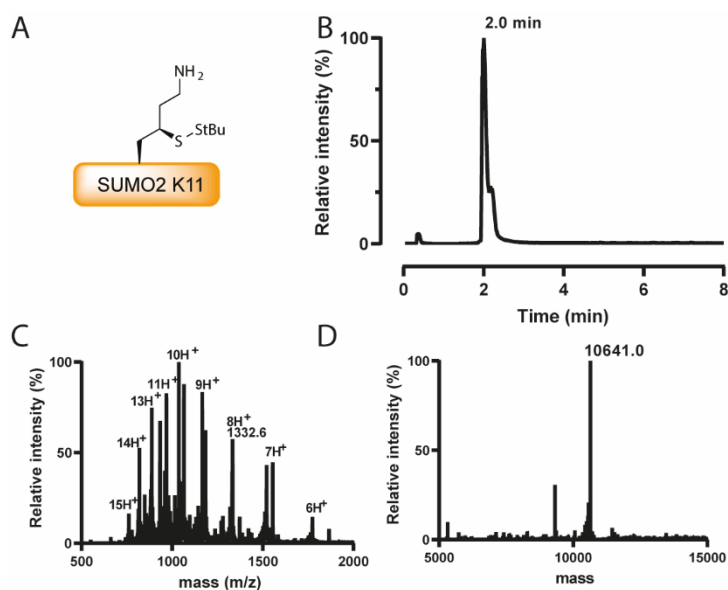

**Figure S16. A.** Schematic representation of SUMO2 K11 thiolysine. **B.** Total ion spectrum of SUMO2 K11 thiolysine, Rt 2.0 min. **C.** ESI spectrum of purified SUMO2 K11 thiolysine. Calculated Mass (average isotope composition): 10634.44;  $[M + 6H]^{6+}$ : 1773.41,  $[M + 7H]^{7+}$ : 1520.20,  $[M + 8H]^{8+}$ : 1330.31,  $[M + 9H]^{9+}$ : 1182.60,  $[M + 10H]^{10+}$ : 1064.44,  $[M + 11H]^{11+}$ : 967.76,  $[M + 12H]^{12+}$ : 887.20,  $[M + 13H]^{13+}$ : 819.04. Observed: 10633.44;  $[M + 6H]^{6+}$ : 1773.24,  $[M + 7H]^{7+}$ : 1520.06,  $[M + 8H]^{8+}$ : 1332.55,  $[M + 9H]^{9+}$ : 1182.36,  $[M + 10H]^{10+}$ : 1064.35,  $[M + 11H]^{11+}$ : 967.68,  $[M + 12H]^{12+}$ : 887.04,  $[M + 13H]^{13+}$ : 819.12. **D.** Deconvoluted mass of SUMO2 K11 thiolysine. Calculated: 10640.8, observed: 10641.0.

### Synthesis of SUMO3 thiolysine derivatives (K11, K41)

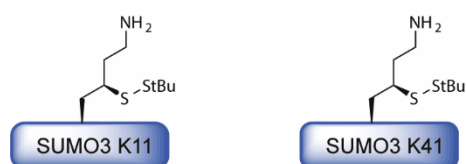

The synthesis was performed following general procedures (method 2) using 2-chlorotriyl resin (0.11 gram, 0.18 mmol/gram). The peptide was cleaved from the resin according to the general procedures and purified by RP-HPLC using a Phenomenex, Luna 100 Å, C8(2), 10 μm, 30 mm x 250 mm column (18-40 % B over 20 min, flow 30 mL/min) and lyophilized to afford the desired peptide as a white solid.

SUMO3 K11 thiolysine: 14.74 mg, 0.13 μmol, 7.0 % yield

SUMO3 K41 thiolysine: 16.53 mg, 0.15 μmol, 7.8 % yield

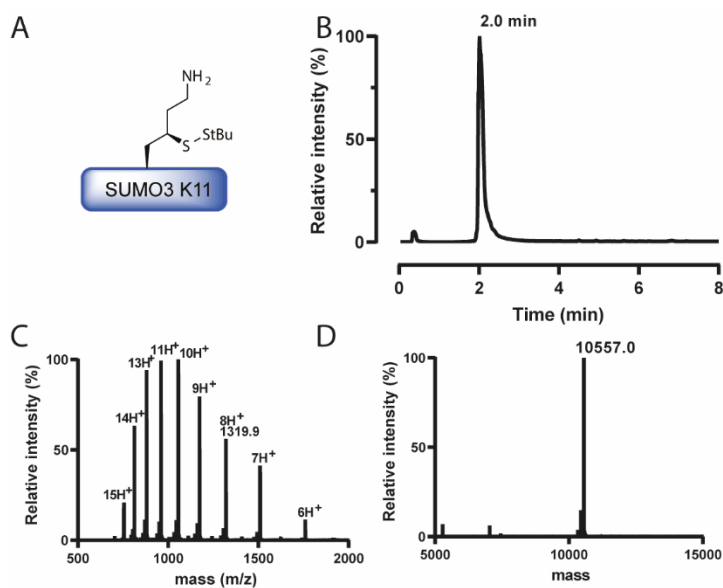

**Figure S17. A.** Schematic representation of SUMO3 K11 thiolysine. **B.** Total ion spectrum of SUMO3 K11 thiolysine, Rt 2.0 min. **C.** ESI spectrum of purified SUMO3 K11 thiolysine. Calculated Mass (average isotope composition): 10550.40;  $[M + 6H]^{6+}$ : 1759.4,  $[M + 7H]^{7+}$ : 1508.2,  $[M + 8H]^{8+}$ : 1319.8,  $[M + 9H]^{9+}$ : 1173.27,  $[M + 10H]^{10+}$ : 1056.04,  $[M + 11H]^{11+}$ : 960.13,  $[M + 12H]^{12+}$ : 880.20,  $[M + 13H]^{13+}$ : 812.57. Observed: 10551.42;  $[M + 6H]^{6+}$ : 1759.57,  $[M + 7H]^{7+}$ : 1508.34,  $[M + 8H]^{8+}$ : 1319.93,  $[M + 9H]^{9+}$ : 1173.38,  $[M + 10H]^{10+}$ : 1056.14,  $[M + 11H]^{11+}$ : 960.13,  $[M + 12H]^{12+}$ : 880.29,  $[M + 13H]^{13+}$ : 812.66. **D.** Deconvoluted mass of SUMO2 K11 thiolysine. Calculated: 10556.7, observed: 10557.0.

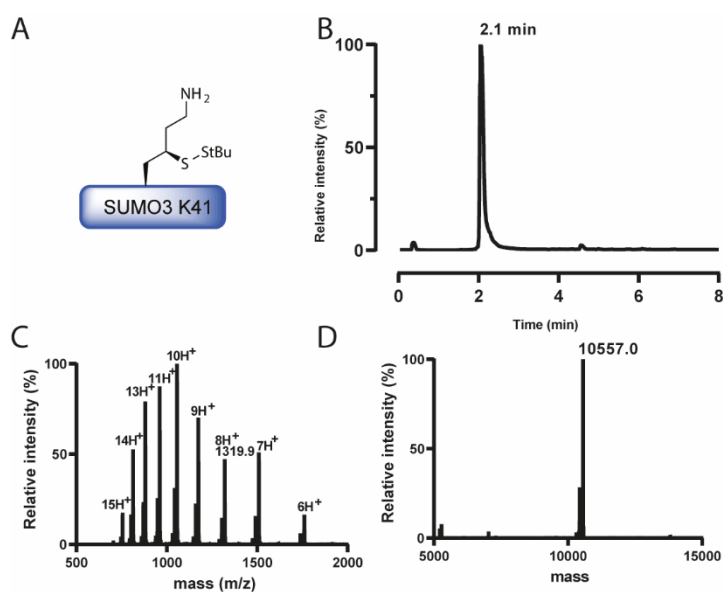

**Figure S18. A.** Schematic representation of SUMO3 K41 thiolysine. **B.** Total ion spectrum of SUMO3 K41 thiolysine, Rt 2.1 min. **C.** ESI spectrum of purified SUMO3 K41 thiolysine. Calculated Mass (average isotope composition): 10550.40;  $[M + 6H]^{6+}$ : 1759.4,  $[M + 7H]^{7+}$ : 1508.2,  $[M + 8H]^{8+}$ : 1319.8,  $[M + 9H]^{9+}$ : 1173.27,  $[M + 10H]^{10+}$ : 1056.04,  $[M + 11H]^{11+}$ : 960.13,  $[M + 12H]^{12+}$ : 880.20,  $[M + 13H]^{13+}$ : 812.57. Observed: 10551.36;  $[M + 6H]^{6+}$ : 1759.56,  $[M + 7H]^{7+}$ : 1508.34,  $[M + 8H]^{8+}$ : 1319.93,  $[M + 9H]^{9+}$ : 1173.38,  $[M + 10H]^{10+}$ : 1056.14,  $[M + 11H]^{11+}$ : 960.22,  $[M + 12H]^{12+}$ : 880.29,  $[M + 13H]^{13+}$ : 812.65. **D.** Deconvoluted mass of SUMO2 K11 thiolysine. Calculated: 10557.0, observed: 10557.0.

## SUMO dimer synthesis

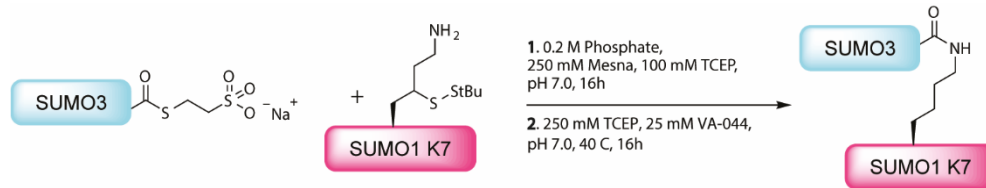

SUMO dimers were synthesized using the same protocol as was established for the 96-well synthesis with some minor adjustments. In short, SUMO1 was dissolved in 20 mM DMSO followed by dilution into buffer containing 0.2 M Na<sub>2</sub>HPO<sub>4</sub>, 250 mM MESNa and 0.15 M NaCl, 50 mM TCEP pH 7.95 for a final concentration of 1 mM. Peptide **1** (1.5 equiv.) was added as solid to the reaction mixture followed by pH adjustment to pH 7.6. The reaction mixture was shaken at 37 °C for 16 hours followed by gel analysis of the reaction. Followed by the addition of an equal amount of 0.2 M Na<sub>2</sub>HPO<sub>4</sub>, 500 mM TCEP and 50 mM VA-044 in MilliQ, resulting in a final buffer concentration of 0.2 M Na<sub>2</sub>HPO<sub>4</sub>, 250 mM TCEP, 125 mM MESNa and 25 mM VA-044 in MilliQ. The reaction was shaken at 350 rpm at 40 °C for 16 hours. Thereafter, the reaction mixture was diluted with 6 M Gdn HCl and purified by RP-HPLC using a Phenomenex, Jupiter 300 Å, C4, 5 μm, 10 mm x 250 mm column. The fractions containing the product were pooled and lyophilized before final purification using SEC. The peptides were dissolved in 2 M Gdn HCl and purified on a Superdex 75 10/300 GL column (GE Healthcare). Fractions were analyzed by SDS-page and pure fractions were pooled, followed by concentration determination by Nanodrop. Yields are not determined.

SUMO1 K7: 3.91 mg, SUMO3 (**1**): 6.25 mg.  
 SUMO1 K17: 3.22 mg, SUMO3 (**1**): 5.85 mg.  
 SUMO1 K37: 3.83 mg, SUMO3 (**1**): 6.48 mg.

SUMO2 K11: 4.32 mg, SUMO3 (**1**): 7.09 mg.

SUMO3 K41: 5.53 mg, SUMO3 (**1**): 6.29 mg.  
 SUMO3 K11: 3.74 mg, SUMO3 (**1**): 4.63 mg.

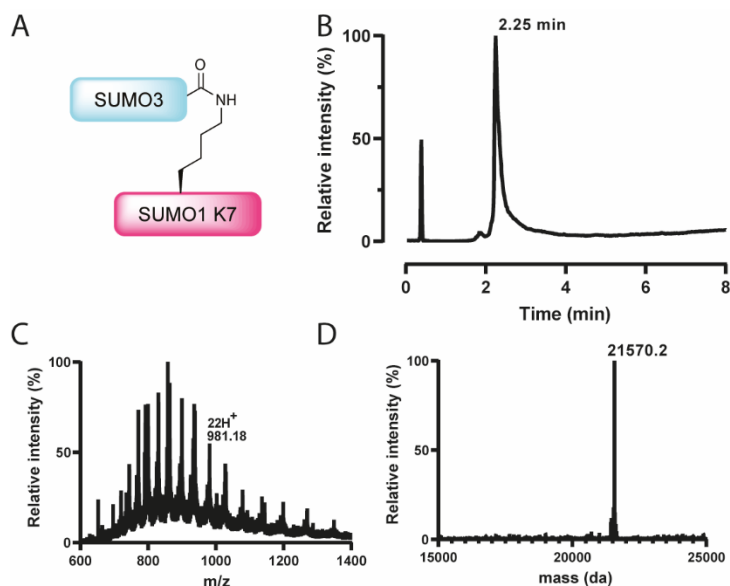

**Figure S19.** **A.** Schematic representation of S3-S1 K7 dimer. **B.** Total ion spectrum (LC-MS method C4) of S3-S1 K7, Rt 2.25 min. **C.** ESI spectrum of purified S3-S1 K7. **D.** Deconvoluted mass of S3S1 K7. Calculated: 21567.0, observed: 21570.2 .



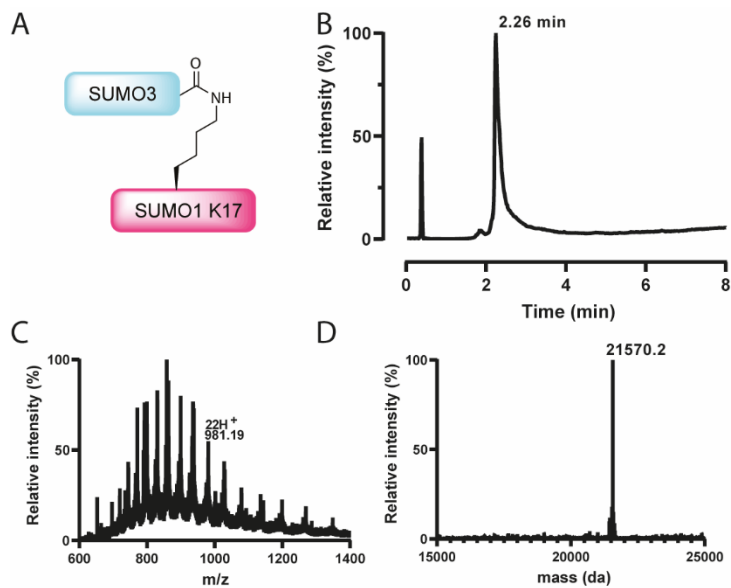

**Figure S20.** A. Schematic representation of S3-S1 K17 dimer. B. Total ion spectrum (LC-MS method C4) of S3-S1 K17, Rt 2.26 min. C. ESI spectrum of purified S3-S1 K17. D. Deconvoluted mass of S3-S1 K7. Calculated: 21567.0, observed: 21570.2.

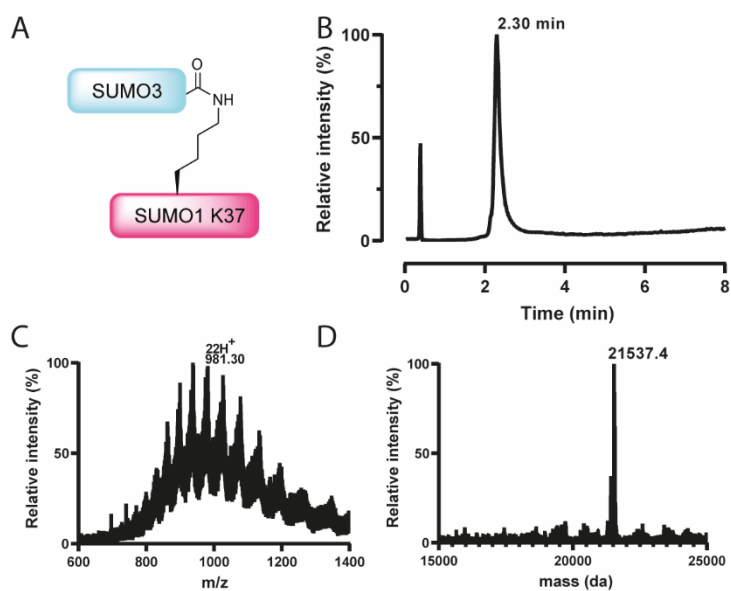

**Figure S21.** A. Schematic representation of S3-S1 K37 dimer. B. Total ion spectrum (LC-MS method C4) of S3-S1 K37, Rt 2.30 min. C. ESI spectrum of purified S3-S1 K37. D. Deconvoluted mass of S3-S1 K37. Calculated: 21567.0, observed: 21537.4. The mass observed is from S3-S1 K37 where the native cysteine is desulfurized.

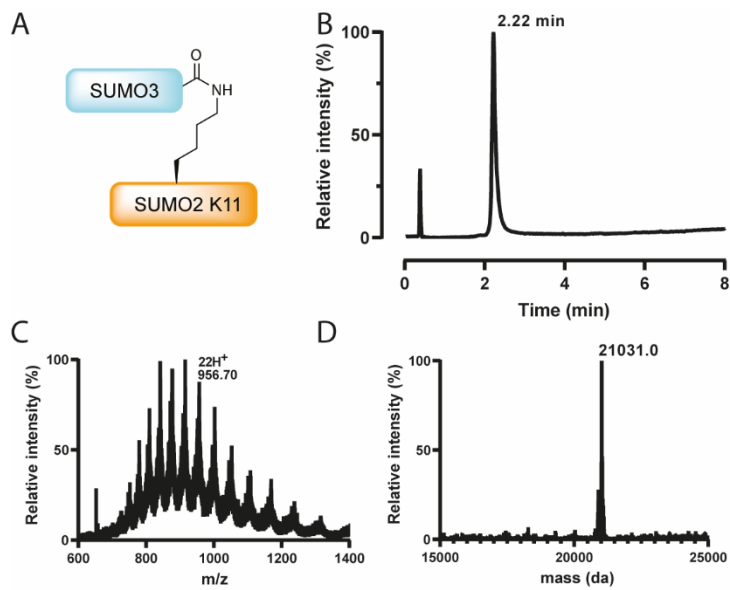

**Figure S22.** A. Schematic representation of S3-S2 K11 dimer. B. Total ion spectrum (LC-MS method C4) of S3-S2 K11, Rt 2.22 min. C. ESI spectrum of purified S3-S2 K11. D. Deconvoluted mass of S3-S2 K11. Calculated: 21027.3, observed: 21031.0.

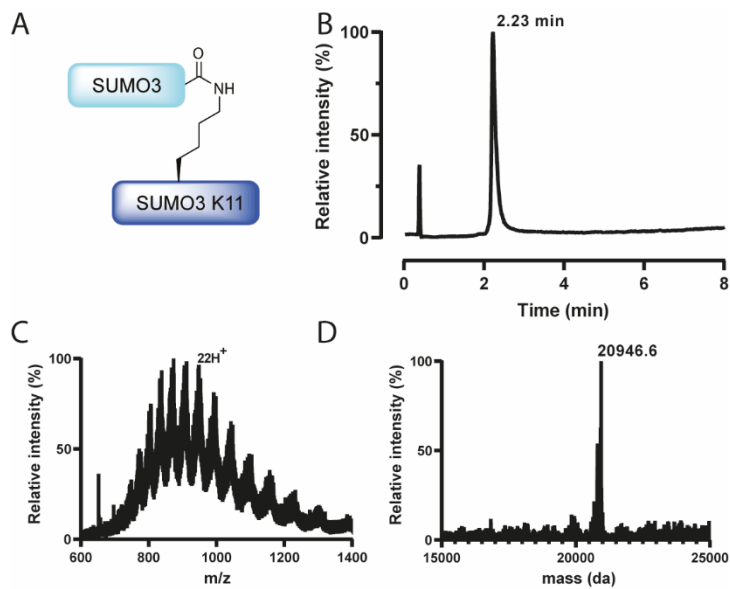

**Figure S23.** A. Schematic representation of S3-S3 K11 dimer. B. Total ion spectrum (LC-MS method C4) of S3-S3 K11, Rt 2.23 min. C. ESI spectrum of purified S3-S3 K11. D. Deconvoluted mass of S3-S3 K11. Calculated: 20943.2, observed: 20946.6.

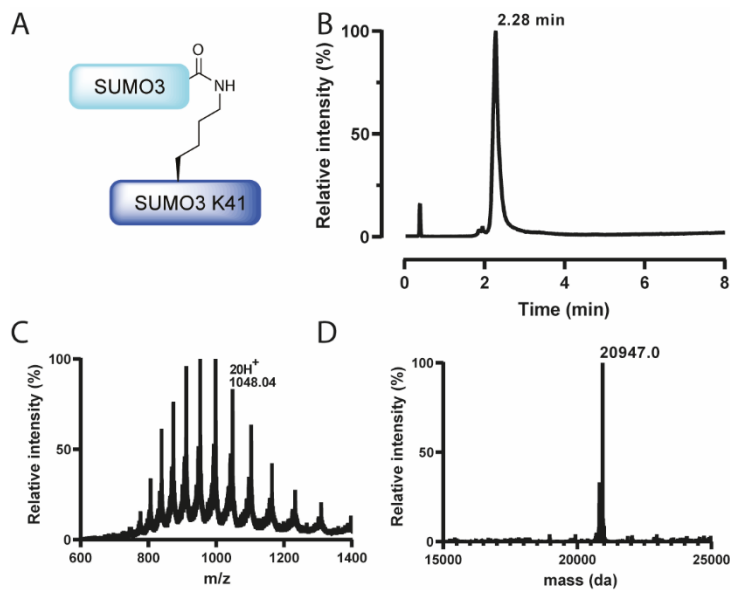

**Figure S24.** A. Schematic representation of S3-S3 K41 dimer. B. Total ion spectrum (LC-MS method C4) of S3-S3 K41, Rt 2.28 min. C. ESI spectrum of purified S3-S3 K41. D. Deconvoluted mass of S3-S3 K41. Calculated: 20943.2, observed: 20947.0.

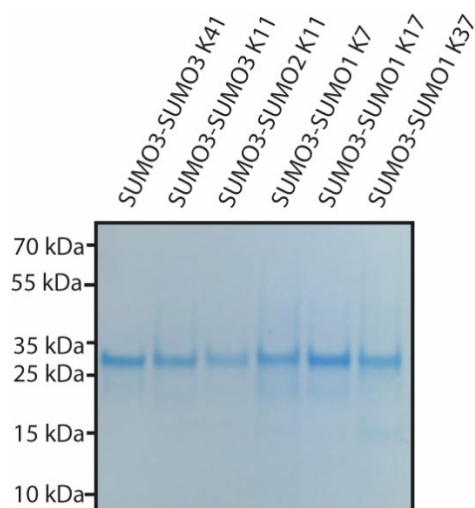

**Figure S25.** SDS-page analysis of all SUMO3 dimers.

### Fluorescence Polarization SENP Assay

Fluorescent polarization (FP) assays were performed as described by Geurink et al. Assays were performed in TRIS buffer (50 mM Tris.HCl, pH 7.5, 5 mM DTT, 100 mM NaCl, 1 mg/mL 3-{Dimethyl[3-(3 $\alpha$ ,7 $\alpha$ ,12 $\alpha$ -trihydroxy-5 $\beta$ -cholan-24-amido)propyl]azaniumyl}propane-1-sulfonate (CHAPS) and 0.5 mg/mL bovine gamma globulin (BGG)). All probes (150 nL of 40  $\mu$ M in DMSO, final concentration 400 nM) were dispensed into “non-binding surface flat bottom low flange” black 384-well plates (Corning) plates using an ECHO 550 Liquid Handler (Labcyte Inc.) acoustic dispenser. Buffer was predispensed (10  $\mu$ L/well) and the reaction was started by the addition of enzyme (SENP1, SENP2, SENP5, SENP6, and SENP7) (5  $\mu$ L/well, final concentration in table S6). The plate was centrifuged (1 min at 1,500 rpm) prior to the measurement. FP of the TAMRA fluorophore was measured every 81 seconds for 90 minutes on a Pherastar plate reader (BMG LABTECH GmbH, Germany) with 540-590-590 FP module ( $\lambda_{ex}$  = 540 nm with detection of polarization at  $\lambda_{em}$  = 590 nm). The obtained data was analyzed by GraphPad prism (version 9.0.1).

**In vitro SENP assay**

Qualitative in vitro linkage specificity assays were performed as described by Mevissen et al. and Licchesi et al. In short, to diSUMO probes dissolved in 100 mM NaCl, 100 mM Tris (pH 7.4), and 2 mM TCEP, SENP was added according to the concentrations in table S7. Pilot experiments identified the required SENP concentration that resulted in cleavage of the preferred chain type. 2 µg diSUMO was taken out of the reaction mixture at the indicated time points. The reaction is resolved on 4-12% SDS-page gradient gels (Invitrogen) run in MES buffer (Invitrogen) and stained by Instant Blue (Abcam) protein stain.
